# Supplementary material
Source: PubMed Central journal article supplement (PMC4818679)
Supplement: NIHMS763326-supplement-SI.pdf [file NIHMS763326-supplement-SI.pdf]

## Experimental Procedures

**General.** Unless otherwise noted, all chemicals and reagents were obtained from commercial suppliers (Sigma-Aldrich, VWR, Alfa Aesar) and used without further purification. Silica gel chromatography was carried out using AMD Silica Gel 60, 230-400 mesh.  $^1\text{H}$  and  $^{13}\text{C}$  NMR spectra were recorded on a Varian Inova 300 MHz or 500 MHz, or Bruker Prodigy 400 MHz instrument, in  $\text{CDCl}_3$  and are referenced to residual protio solvent signals. Data for  $^1\text{H}$  NMR are reported as follows: chemical shift ( $\delta$  ppm), multiplicity (s = singlet, d = doublet, t = triplet, q = quartet, m = multiplet, dd = doublet of doublets, dt = doublet of triplets, dq = doublet of quartets, ddd = doublet of doublet of doublets, td = triplet of doublets), coupling constant (Hz), integration. Sonication was performed using a Qsonica Q500 sonicator. High-resolution mass spectra were obtained at the California Institute of Technology Mass Spectral Facility. Specific optical rotations were measured using a Jasco P-2000 Polarimeter, and are reported in units of  $\text{deg}\cdot\text{cm}^3\cdot\text{g}^{-1}\cdot\text{dm}^{-1}$ . Synthetic reactions were monitored using thin layer chromatography (Merck 60 gel plates) using a UV-lamp for visualization.

**Chromatography.** Analytical high-performance liquid chromatography (HPLC) was carried out using an Agilent 1200 series instrument and a Kromasil 100 C18 column (4.6 x 50 mm, 5  $\mu\text{m}$ ) with water and acetonitrile as the mobile phase. Semi-preparative HPLC was performed using an Agilent XDB-C18 column (9.4 x 250 mm, 5  $\mu\text{m}$ ) with water and acetonitrile as the mobile phase. Analytical chiral HPLC was conducted using a supercritical fluid chromatography (SFC) system with isopropanol and liquid  $\text{CO}_2$  as the mobile phase. Product enantiomers were separated using Chiralcel OD-H, Chiralcel OJ-H, and Chiralpak AS-H columns (4.6 x 150 mm, 5  $\mu\text{m}$ ) from Chiral Technologies Inc.

**Cloning and site-directed mutagenesis.** pET22b(+) was used as a cloning and expression vector for all enzymes described in this study. Site-directed mutagenesis was performed using a modified QuikChange<sup>TM</sup> mutagenesis protocol. The PCR products were gel purified, digested with DpnI, repaired using Gibson Mix<sup>TM</sup>, and used to directly transform *E. coli* strain BL21(DE3).

**Determination of P411 concentration.** The concentration of P411 enzymes in whole cell experiments was determined from ferrous carbon monoxide binding difference spectra using the previously reported extinction coefficient for serine-ligated enzymes ( $\epsilon = 103,000 \text{ M}^{-1} \text{ cm}^{-1}$ ).<sup>1</sup> The concentration of purified P411 enzymes was determined by quantifying the amount of free hemin present using the pyridine/hemochrome assay.<sup>2</sup>

**Expression and amination bioconversions using whole cells.** *E. coli* BL21(DE3) cells transformed with plasmid encoding P411 variants were grown overnight in 5 mL Luria-Bertani medium with 0.1 mg/mL ampicillin (LB<sub>amp</sub>, 37 °C, 250 rpm). The preculture was used to inoculate 45 mL of Hyperbroth medium (prepared from AthenaES© powder, 0.1 mg/mL ampicillin) in a 125 mL Erlenmeyer flask; this culture was incubated at 37 °C, 230 rpm for 2 h. Cultures were then cooled on ice (20 min) and induced with 0.5 mM IPTG and 0.5 mM 5-aminolevulinic acid (final concentrations). Expression was conducted at room temperature, 130 rpm, for 16 h. Cultures were then centrifuged (2,600 x g, 10 min, 4 °C) and the pellets resuspended to OD<sub>600</sub> = 30 in M9-N. Aliquots of the cell suspension (4 mL) were used to determine the P411 expression level after lysis by sonication.

For amination bioconversions, the cells at OD<sub>600</sub> = 30 in M9-N were degassed by

sparging with argon in sealed 6 mL crimp vials for at least 40 minutes. Separately, glucose (250 mM in M9-N) was degassed by sparging with argon for at least five minutes. To 2 mL crimp vials were added an oxygen depletion system (20  $\mu$ L of a stock solution containing 14,000 U/mL catalase and 1,000 U/mL glucose oxidase in 0.1 M KPi, pH 8.0). All solutions were uncapped and transferred into an anaerobic chamber. Resuspended cells (320  $\mu$ L) were added to the vials, followed by glucose (40  $\mu$ L, 250 mM in M9-N), sulfide (10  $\mu$ L, 200 mM in DMSO), and tosyl azide (10  $\mu$ L, 200 mM in DMSO). Final concentrations were 5 mM sulfide, 5 mM tosyl azide, and 25 mM glucose. The vials were sealed, removed from the anaerobic chamber, and shaken at room temperature, 40 rpm for 20 h. Reactions under aerobic conditions were performed by combining resuspended cells (340  $\mu$ L), glucose (40  $\mu$ L, 250 mM in M9-N), sulfide (10  $\mu$ L, 200 mM in DMSO), and tosyl azide (10  $\mu$ L, 200 mM in DMSO) on the benchtop, without any argon sparging. The reactions were quenched by adding acetonitrile (450  $\mu$ L) and internal standard (10  $\mu$ L of a DMSO stock). For reactions proceeding to >30% conversion (at which point the phenylthiosulfonamide is not completely degraded by cellular reductants), dithiothreitol was added (20  $\mu$ L, 20 mM DTT in 0.1 M KPi, pH 8.0). This mixture was then transferred to a microcentrifuge tube and centrifuged at 14,000 rpm for 10 minutes. The supernatant was transferred to a vial and analyzed by HPLC.

**Reaction screening in 96-well plate format.** Site-saturation libraries were generated employing the “22c-trick” method.<sup>3</sup> *E. coli* libraries were cultured in LB<sub>amp</sub> (300  $\mu$ L/well) at 37 °C, 220 rpm. Hyperbroth medium (1000  $\mu$ L/well, 0.1 mg/mL ampicillin) was inoculated with the preculture (50  $\mu$ L/well) and incubated at 37 °C, 220 rpm, 80% humidity for 3 h. The plates were cooled on ice for 30 minutes and then induced with 0.5 mM IPTG and 1 mM 5-aminolevulinic acid (final

concentrations). Expression was conducted at 20 °C, 120 rpm for 24 h. The cells were pelleted (3,000 x g, 5 min, 4 °C) and resuspended in the oxygen depletion system (20 µL/well). The 96-well plate was then transferred to an anaerobic chamber. In the anaerobic chamber, argon-sparged reaction buffer (50 mM glucose in M9-N, 300 µL/well) was added, followed by sulfide (10 µL/well, 200 mM in DMSO) and tosyl azide (10 µL/well, 200 mM in DMSO). The plate was sealed with an aluminum foil, removed from the anaerobic chamber, and shaken at 40 rpm. After 16 hours, the seal was removed and acetonitrile (400 µL/well) and internal standard (10 µL/well of a DMSO stock) were added. The wells were mixed, the plate was centrifuged (5,000 x g, 10 min), and the supernatant was filtered through an AcroPrep 96-well filter plate (0.2 µm) into a shallow-well plate for HPLC analysis.

For the screening of site-saturation libraries for activity on sulfide **1**, we used batches of sulfide **1** favoring the *E*-alkene (3:1 or 4.5:1 *E:Z*) for the first three libraries (at residues A268, L437, and S438), while for the next set of libraries (at residues A78, A82, T260, and P329) we performing screening using *Z*-**1** (>15:1 *Z:E*).

**Protein purification.** *E. coli* BL21(DE3) cells transformed with plasmid encoding P411 variants were grown overnight in 25 mL LB<sub>amp</sub> (37 °C, 250 rpm). Hyperbroth medium (470 mL, 0.1 mg/mL ampicillin) in a 1 L flask was inoculated with 19 mL of the preculture and incubated at 37 °C, 230 rpm for 2.5 h (OD<sub>600</sub> ca. 1.8). Cultures were then cooled on ice (30 min) and induced with 0.5 mM IPTG and 1 mM 5-aminolevulinic acid (final concentrations). Expression was conducted at room temperature, 130 rpm, for 20–24 h. Cultures were then centrifuged (5,000 x g, 5 min, 4 °C) and the cell pellets frozen at –20 °C. Frozen cells were resuspended in buffer A (25 mM tris, 20 mM imidazole, 200 mM NaCl, pH 7.5, 4 mL/g of cell wet weight), loaded with 300

$\mu\text{g/mL}$  hemin, and lysed by sonication. To pellet insoluble material, lysates were centrifuged ( $20,000 \times g$ , 15 min,  $4^\circ\text{C}$ ). Proteins were expressed in a construct containing a 6x-His tag and purified using a nickel NTA column (1 mL HisTrap HP, GE Healthcare, Piscataway, NJ) using an AKTExpress purifier FPLC system (GE healthcare). P411 enzymes were eluted on a linear gradient from 100% buffer A/0% buffer B (25 mM tris, 300 mM imidazole, 200 mM NaCl, pH 7.5) to 100% buffer B over 10 column volumes. Fractions containing P411 enzymes were pooled, concentrated, and subjected to three exchanges of phosphate buffer (0.1 M KPi, pH 8.0) to remove excess salt and imidazole. Concentrated proteins were aliquoted, flash-frozen on powdered dry ice, and stored at  $-20^\circ\text{C}$ .

**Amination bioconversions using purified protein.** Purified P411 enzyme (in 0.1 M KPi, pH 8.0, 30  $\mu\text{L}$ ) and the oxygen depletion system (20  $\mu\text{L}$ ) were added to 2 mL crimp vials. Portions of phosphate buffer (250  $\mu\text{L}$  0.1 M KPi, pH 8.0), glucose (40  $\mu\text{L}$ , 250 mM), and NADPH (40  $\mu\text{L}$ , 100 mM), or multiples thereof, were combined in a 6 mL crimp vial and degassed by sparging with argon for at least 10 min. All solutions were uncapped and transferred into an anaerobic chamber. The buffer/reductant/glucose solution (330  $\mu\text{L}$ ) was added to the reaction vials, followed by sulfide (10  $\mu\text{L}$ , 200 mM in DMSO) and tosyl azide (10  $\mu\text{L}$ , 200 mM in DMSO). Final concentrations were typically 5 mM sulfide, 5 mM tosyl azide, 10 mM NADPH, 25 mM glucose, and 10  $\mu\text{M}$  P411. The vials were sealed, removed from the anaerobic chamber, and shaken at room temperature, 40 rpm for 20 h. The reactions were quenched by adding acetonitrile (450  $\mu\text{L}$ ) and internal standard (10  $\mu\text{L}$  of a DMSO stock). For reactions proceeding to  $>10\%$  conversion, dithiothreitol was added (20  $\mu\text{L}$ , 20 mM DTT in 0.1 M KPi, pH 8.0). This mixture was then transferred to a microcentrifuge tube and centrifuged at 14,000 rpm for 10

minutes. The supernatant was transferred to a vial and analyzed by HPLC. Sodium dithionite (5 mM) was used as the reductant for reactions with hemin, myoglobin, and cytochrome *c*. Myoglobin (equine heart) and cytochrome *c* (bovine heart) were purchased from Sigma-Aldrich.

### Synthesis of substrates.

Thioanisole and ethyl phenyl sulfide were purchased from Sigma-Aldrich and used without further purification. Other sulfides were synthesized according to known procedures, and their spectral data are in agreement with reported values.<sup>4</sup> Tosyl azide was prepared according to de Nanteuil and Waser.<sup>5</sup>

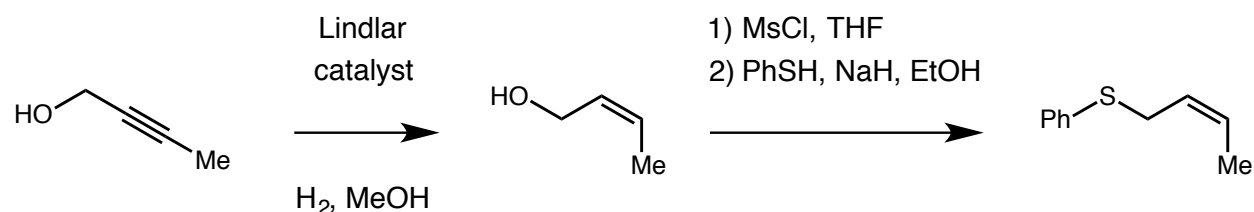

(*Z*)-But-2-en-1-yl(phenyl)sulfide (**Z-1**) was prepared in two steps via Lindlar hydrogenation of 2-butyne-1-ol according to Balduzzi *et al.*<sup>6</sup> followed by mesylation and displacement with thiophenolate according to Hiroi and Makino.<sup>7</sup> The sulfide was obtained in 26% yield from (*Z*)-2-buten-1-ol as a >15:1 *Z*:*E* mixture of alkene isomers: <sup>1</sup>H NMR (300 MHz, CDCl<sub>3</sub>) δ 7.40–7.24 (m, 4H), 7.22–7.14 (m, 1H), 5.87–5.47 (m, 2H), 3.58 (d, *J* = 6.6 Hz, 2H), 1.61–1.54 (m, 3H); <sup>13</sup>C NMR (101 MHz, CDCl<sub>3</sub>) δ 136.5, 130.0, 128.9, 127.8, 126.3, 125.5, 31.0, 12.8; HRMS (FAB) exact mass calculated for C<sub>10</sub>H<sub>12</sub>S requires *m/z* 164.0660, found 164.0653.

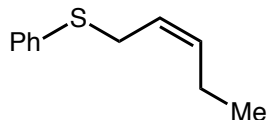

(*Z*)-Pent-2-en-1-yl(phenyl)sulfide was prepared as above from *cis*-2-penten-1-ol in 15% yield, and obtained as a >15:1 *Z*:*E* mixture:  $^1\text{H}$  NMR (300 MHz,  $\text{CDCl}_3$ )  $\delta$  7.40–7.14 (m, 5H), 5.56–5.42 (m, 2H), 3.57 (d,  $J$  = 6.4 Hz, 2H), 2.10–1.92 (m, 2H), 0.90 (t,  $J$  = 7.5 Hz, 3H);  $^{13}\text{C}$  NMR (101 MHz,  $\text{CDCl}_3$ ):  $\delta$  136.5, 135.4, 130.1, 128.9, 126.3, 123.9, 31.3, 20.7, 14.2; HRMS (FAB) exact mass calculated for  $\text{C}_{11}\text{H}_{14}\text{S}$  requires  $m/z$  178.0816, found 178.0822.

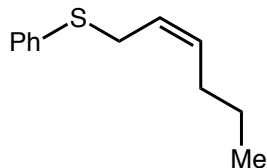

(*Z*)-Hex-2-en-1-yl(phenyl)sulfide was prepared as above from *cis*-2-hexen-1-ol in 53% yield, and obtained as a >15:1 *Z*:*E* mixture:  $^1\text{H}$  NMR (300 MHz,  $\text{CDCl}_3$ ):  $\delta$  7.39–7.32 (m, 2H), 7.31–7.23 (m, 2H), 7.22–7.14 (m, 1H), 5.59–5.45 (m, 2H), 3.63–3.52 (m, 2H), 2.05–1.90 (m, 2H), 1.32 (ddt,  $J$  = 14.3, 7.9, 7.0, 2H), 0.87 (t,  $J$  = 7.3 Hz, 3H);  $^{13}\text{C}$  NMR (101 MHz,  $\text{CDCl}_3$ ):  $\delta$  136.6, 133.6, 130.0, 128.9, 126.3, 124.7, 31.4, 29.4, 22.7, 13.9; HRMS (FAB) exact mass calculated for  $\text{C}_{12}\text{H}_{16}\text{S}$  requires  $m/z$  192.0973, found 192.0964.

### Characterization of reaction products.

Authentic standards corresponding to enzymatic reaction products were prepared by tosylation of the corresponding allylic amine or by nitrene transfer to the corresponding sulfide according to the method of Okamura and Bolm.<sup>8</sup> Phenylthiosulfonamides were cleaved to the corresponding sulfonamides by treatment with 0.5 M potassium hydroxide in methanol, according to Murakami

*et al.*<sup>9</sup> All products are known compounds, and their spectral data are in agreement with reported values.<sup>9,10</sup>

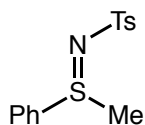

*S*-Methyl-*S*-phenyl-*N*-(4-methylbenzenesulfonyl)sulfimide (**11**): <sup>1</sup>H NMR (400 MHz, CDCl<sub>3</sub>) δ 7.77–7.67 (m, 4H), 7.57–7.45 (m, 3H), 7.20–7.14 (m, 2 H), 2.84 (s, 3H), 2.35 (s, 3H).

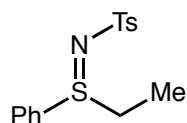

*S*-Ethyl-*S*-phenyl-*N*-(4-methylbenzenesulfonyl)sulfimide (**12**): <sup>1</sup>H NMR (300 MHz, CDCl<sub>3</sub>) δ 7.76–7.70 (m, 2H), 7.69–7.62 (m, 2H), 7.55–7.43 (m, 3H), 7.19–7.10 (m, 2H), 3.12–2.90 (m, 2H), 2.33 (s, 3H), 1.17 (t, *J* = 7.3 Hz, 3H).

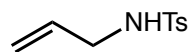

*N*-Allyl-4-methylbenzenesulfonamide (**13**): <sup>1</sup>H NMR (300 MHz, CDCl<sub>3</sub>) δ 7.75 (d, *J* = 8.3 Hz, 2H), 7.34–7.27 (m, 2H), 5.71 (ddt, *J* = 17.1, 10.2, 5.8 Hz, 1H), 5.16 (dq, *J* = 17.1, 1.5 Hz, 1H), 5.08 (dq, *J* = 10.2, 1.4 Hz, 1H), 4.73 (t, *J* = 6.2 Hz, 1H), 3.57 (tt, *J* = 6.0, 1.5 Hz, 2H), 2.42 (s, 3H).

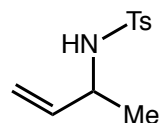

*N*-(But-3-en-2-yl)-4-methylbenzenesulfonamide (**10**): <sup>1</sup>H NMR (500 MHz, CDCl<sub>3</sub>) δ 7.75 (d, *J* = 8.3 Hz, 2H), 7.30–7.26 (m, 2H), 5.63 (ddd, *J* = 17.2, 10.4, 5.8 Hz, 1H), 5.05 (ddd, *J* = 17.1, 1.5, 1.0 Hz, 1H), 4.96 (dt, *J* = 10.4, 1.2 Hz, 1H), 4.76 (d, *J* = 7.7 Hz, 1H), 3.93–3.84 (m, 1H), 2.42 (s, 3H), 1.17 (d, *J* = 6.8 Hz, 3H).



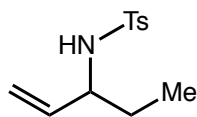

*N*-(Pent-1-en-3-yl)-4-methylbenzenesulfonamide (**14**):  $^1\text{H}$  NMR (300 MHz,  $\text{CDCl}_3$ )  $\delta$  7.74 (d,  $J = 8.3$  Hz, 2H), 7.31–7.25 (m, 2H), 5.53 (ddd,  $J = 17.0$ , 10.3, 6.4 Hz, 1H), 5.03–4.94 (m, 2H), 4.49 (d,  $J = 8.0$  Hz, 1H), 3.76–3.63 (m, 1H), 2.42 (s, 3H), 1.50 (p,  $J = 7.3$  Hz, 2H), 0.82 (t,  $J = 7.4$  Hz, 3H).

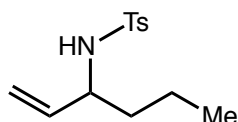

*N*-(Hex-1-en-3-yl)-4-methylbenzenesulfonamide (**15**):  $^1\text{H}$  NMR (400 MHz,  $\text{CDCl}_3$ )  $\delta$  7.74 (d,  $J = 8.3$  Hz, 2H), 7.30–7.24 (m, 2H), 5.53 (ddd,  $J = 17.0$ , 10.3, 6.6 Hz, 1H), 5.01–4.91 (m, 2H), 4.63 (d,  $J = 7.9$  Hz, 1H), 3.80–3.70 (m, 1H), 2.41 (s, 3H), 1.48–1.39 (m, 2H), 1.34–1.18 (m, 2H), 0.82 (t,  $J = 7.3$  Hz, 3H).

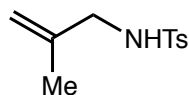

*N*-(2-Methylallyl)-4-methylbenzenesulfonamide (**16**):  $^1\text{H}$  NMR (300 MHz,  $\text{CDCl}_3$ )  $\delta$  7.75 (d,  $J = 8.3$  Hz, 2H), 7.33–7.28 (m, 2H), 4.67–4.79 (m, 2H), 4.64 (t,  $J = 6.4$  Hz, 1H), 3.47 (d,  $J = 6.5$  Hz, 2H), 2.43 (s, 3H), 1.67 (s, 3H).

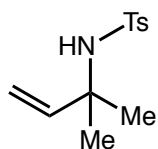

*N*-(2-Methylbut-3-en-2-yl)-4-methylbenzenesulfonamide (**17**):  $^1\text{H}$  NMR (300 MHz,  $\text{CDCl}_3$ )  $\delta$  7.75 (d,  $J = 8.3$  Hz, 2H), 7.29–7.23 (m, 2H), 5.77 (dd,  $J = 17.3$ , 10.6 Hz, 1H), 5.08 (dd,  $J = 17.3$ , 0.7 Hz, 1H), 4.97–4.89 (m, 2H), 2.41 (s, 3H), 1.29 (s, 6H).

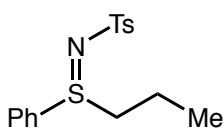

*S*-(*n*-Propyl)-*S*-phenyl-*N*-(4-methylbenzenesulfonyl)sulfimide (**18**):  $^1\text{H}$  NMR (300 MHz,  $\text{CDCl}_3$ )  $\delta$  7.74 (d,  $J = 8.2$  Hz, 2H), 7.70–7.65 (m, 2H), 7.56–7.45 (m, 3H), 7.16–7.12 (m, 2H), 3.08 (ddd,  $J = 12.7$ , 8.3, 5.6 Hz, 1H),

2.85 (ddd,  $J = 12.7, 8.6, 7.1$  Hz, 1H), 2.34 (s, 3H), 1.75–1.55 (m, 2H), 0.95 (t,  $J = 7.4$  Hz, 3H).

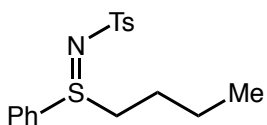

*S*-(*n*-Butyl)-*S*-phenyl-*N*-(4-methylbenzenesulfonyl)sulfimide (**19**):  $^1\text{H}$  NMR (300 MHz,  $\text{CDCl}_3$ )  $\delta$  7.77–7.64 (m, 4H), 7.55–7.44 (m, 3H), 7.18–7.12 (m, 2H), 3.07 (ddd,  $J = 12.8, 8.5, 5.6$  Hz, 1H), 2.87 (ddd,  $J = 12.7, 8.8, 7.0$  Hz, 1H), 2.34 (s, 3H), 1.70–1.43 (m, 2H), 1.42–1.20 (m, 2H), 0.82 (t,  $J = 7.3$  Hz, 3H).

**Table S1.** Mutations present in P450<sub>BM3</sub> variants used in this work.

| <b>Variant</b>                        | <b>Mutations relative to wild-type P450<sub>BM3</sub></b>                                                                 |
|---------------------------------------|---------------------------------------------------------------------------------------------------------------------------|
| P411 <sub>BM3</sub> -CIS T438S<br>(P) | V78A, F87V, P142S, T175I, A184V, S226R, H236Q, E252G, T268A, A290V, L353V, I366V, C400S, T438S, E442K                     |
| P-I263F                               | V78A, F87V, P142S, T175I, A184V, S226R, H236Q, E252G, I263F, T268A, A290V, L353V, I366V, C400S, T438S, E442K              |
| P-I263F A328V                         | V78A, F87V, P142S, T175I, A184V, S226R, H236Q, E252G, I263F, T268A, A290V, A328V, L353V, I366V, C400S, T438S, E442K       |
| P-I263F V87A                          | V78A, F87A, P142S, T175I, A184V, S226R, H236Q, E252G, I263F, T268A, A290V, L353V, I366V, C400S, T438S, E442K              |
| P-I263F V87A<br>A328V                 | V78A, F87A, P142S, T175I, A184V, S226R, H236Q, E252G, I263F, T268A, A290V, A328V, L353V, I366V, C400S, T438S, E442K       |
| P-I263F V87A<br>A328V A268G           | V78A, F87A, P142S, T175I, A184V, S226R, H236Q, E252G, I263F, T268G, A290V, A328V, L353V, I366V, C400S, T438S, E442K       |
| P-I263F V87A<br>A328V A268G A82L      | V78A, A82L, F87A, P142S, T175I, A184V, S226R, H236Q, E252G, I263F, T268G, A290V, A328V, L353V, I366V, C400S, T438S, E442K |
| P-I263F V87A<br>A328V A268G A82I      | V78A, A82I, F87A, P142S, T175I, A184V, S226R, H236Q, E252G, I263F, T268G, A290V, A328V, L353V, I366V, C400S, T438S, E442K |

**Table S2.** Yields and enantioselectivities of whole cell bioconversions represented in Figures 1 and 2 (and some not shown elsewhere).<sup>a</sup>

|                               | Thioanisole         | Phenyl ethyl sulfide        | Phenyl allyl sulfide | Phenyl crotyl sulfide (3:1 <i>E:Z</i> ) | Phenyl crotyl sulfide (>15:1 <i>Z:E</i> ) |
|-------------------------------|---------------------|-----------------------------|----------------------|-----------------------------------------|-------------------------------------------|
| P                             | 19% yield, 660 TTN  | 1.1% yield, 38 TTN          | 1.7% yield, 59 TTN   | 0.2% yield, 7 TTN                       | 0.3% yield, 9 TTN                         |
| P-I263F                       | 51% yield, 2800 TTN | 12% yield, 650 TTN          | 3.1% yield, 170 TTN  | 0.8% yield, 45 TTN                      | 1.4% yield, 77 TTN, 57% ee                |
| P-I263F A328V                 | 63% yield, 1600 TTN | 27% yield, 680 TTN          | 9.0% yield, 230 TTN  | 4.6% yield, 120 TTN                     | 10% yield, 260 TTN, 66% ee                |
| P-I263F V87A                  | 51% yield, 4300 TTN | 43% yield, 3600 TTN, 48% ee | 24% yield, 2000 TTN  | 4.5% yield, 380 TTN                     | 5.5% yield, 460 TTN, 47% ee               |
| P-I263F V87A A328V            | 46% yield, 1600 TTN | 54% yield, 1800 TTN, 82% ee | 27% yield, 930 TTN   | 6.6% yield, 220 TTN                     | 14% yield, 490 TTN, 66% ee                |
| P-I263F V87A A328V A268G      | N.D.                | 75% yield, 2500 TTN, 39% ee | N.D.                 | 17% yield, 580 TTN                      | 44% yield, 1800 TTN, 66% ee               |
| P-I263F V87A A328V A268G A82L | N.D.                | N.D.                        | N.D.                 | N.D.                                    | 70% yield, 1500 TTN, 69% ee               |
| P-I263F V87A A328V A268G A82I | N.D.                | 86% yield, 2200 TTN, 88% ee | N.D.                 | N.D.                                    | 77% yield, 2200 TTN, 68% ee               |

<sup>a</sup>Experiments were performed using whole cells overexpressing the P411 variant, resuspended to  $OD_{600} = 30$ , with 5 mM sulfide and 5 mM tosyl azide. Results are the average of experiments performed with duplicate cell cultures, each used to perform duplicate chemical reactions (total of four reactions). N.D. = Not determined; ee = enantiomeric excess.

**Table S3.** Reactions of other sulfide substrates with intermediate P411 variants. Conditions as in Table S2. The mutations introduced in the course of evolving a catalyst for amination of sulfide **1** are also strongly activating toward amination of related substrates.

|                             | 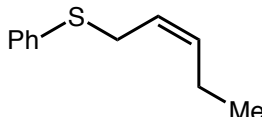 |  |
|-----------------------------|-----------------------------------------------------------------------------------|-------------------------------------------------------------------------------------|
| P-I263F V87A<br>A328V       | 3.8% yield, 130 TTN                                                               | 0.4% yield, 14 TTN                                                                  |
| P-I263F V87A<br>A328V A268G | 18% yield, 600 TTN,<br>71% ee                                                     | 7.9% yield, 260 TTN                                                                 |

**Table S4.** Reactions performed with purified proteins (and hemin).<sup>a</sup>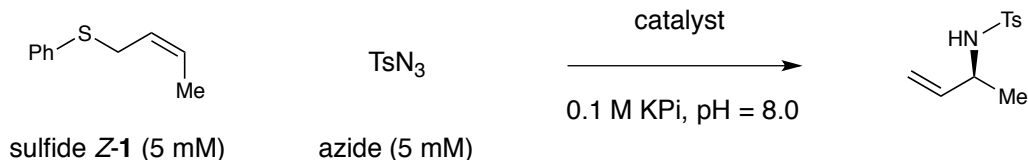

| catalyst                                               | percent yield, total turnovers |
|--------------------------------------------------------|--------------------------------|
| hemin (25 $\mu$ M)                                     | 0.2% yield, <1 TTN             |
| hemin (25 $\mu$ M) + imidazole (1 mM)                  | 0.2% yield, <1 TTN             |
| hemin (25 $\mu$ M) + bovine serum albumin (10 $\mu$ M) | 0.1% yield, <1 TTN             |
| Myoglobin (equine heart)                               | No reaction                    |
| Cytochrome <i>c</i> (bovine heart)                     | No reaction                    |
| P411 <sub>BM3</sub> F87A T268A <sup>b</sup>            | 0.6% yield, 3 TTN              |
| P-I263F                                                | 0.3% yield, 2 TTN              |
| P-I263F A328V L437V <sup>c</sup>                       | 1.7% yield, 9 TTN              |
| P-I263F V87A A328V (P-3)                               | 10% yield, 55 TTN, 63% ee      |
| P-I263F V87A A328V A268G (P-4)                         | 28% yield, 140 TTN, 63% ee     |
| P-I263F V87A A328V A268G A82L                          | 63% yield, 320 TTN, 70% ee     |
| P-I263F V87A A328V A268G A82I (P-5, 10 $\mu$ M)        | 52% yield, 260 TTN, 69% ee     |
| P-I263F V87A A328V A268G A82I (P-5, 5.0 $\mu$ M)       | 51% yield, 510 TTN, 69% ee     |
| P-I263F V87A A328V A268G A82I (P-5, 2.5 $\mu$ M)       | 43% yield, 860 TTN             |
| P-I263F V87A A328V A268G A82I (P-5, 1.25 $\mu$ M)      | 19% yield, 760 TTN             |

<sup>a</sup>Reactions performed in duplicate, with 10  $\mu$ M enzyme unless indicated otherwise; ee = enantiomeric excess. As in whole cells, the intermediate **8** is converted to product **9** by the reductant. The *in vitro* conditions, however, provide fewer reducing equivalents compared to the whole cell conditions, necessitating a DTT work-up for all reactions that proceed to >10%

conversion. <sup>b</sup>Variant previously identified for intramolecular C–H amination.<sup>11</sup> <sup>c</sup>Variant previously identified for aziridination of styrenes.<sup>12</sup>

**Figure S1.** Location of residues subjected to site saturation mutagenesis, shown in yellow in the crystal structure of P-I263F; PBD: 4WG2.<sup>11</sup>

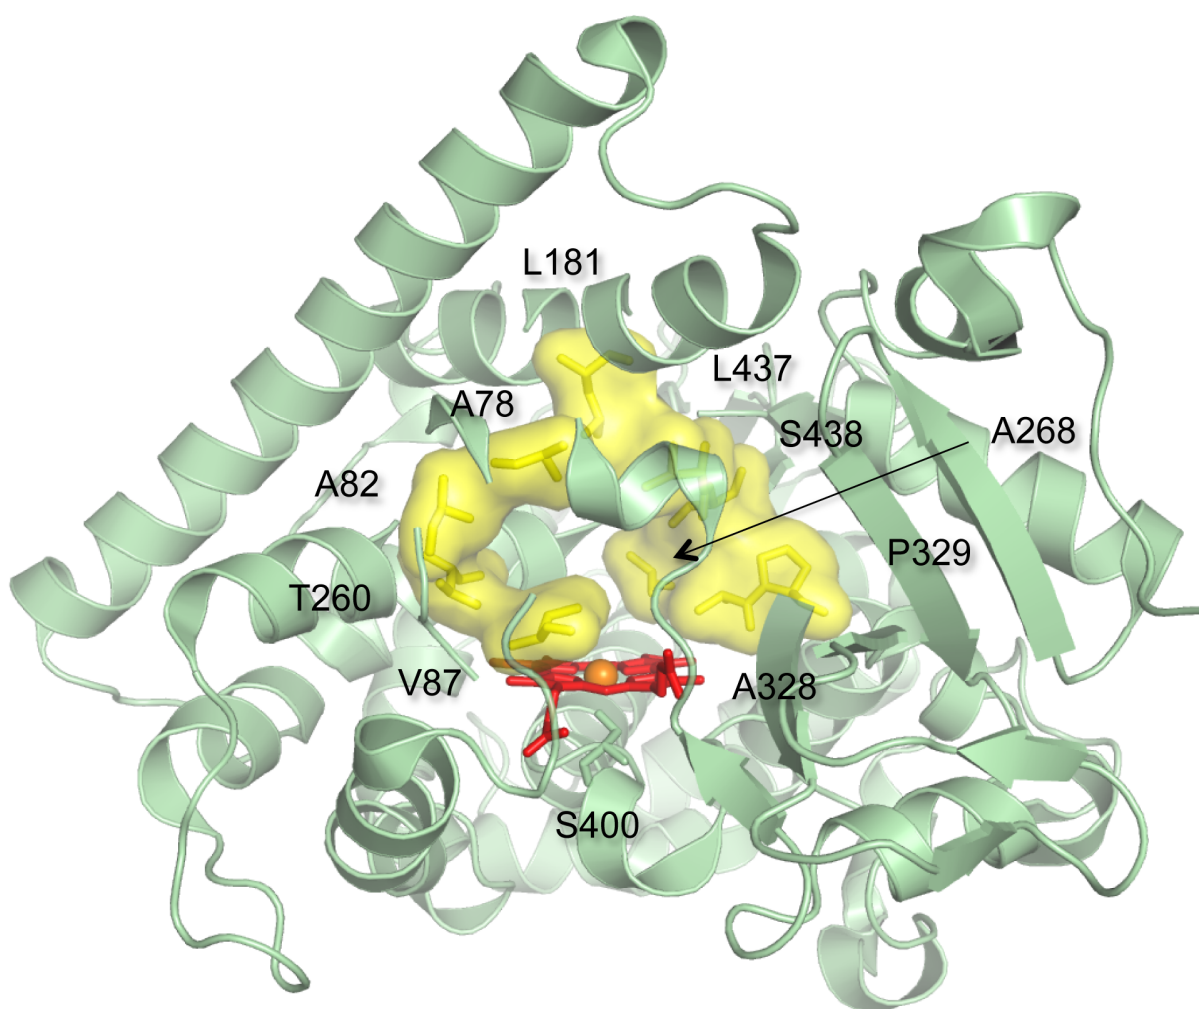

**Semi-preparative scale reactions and assignment of absolute stereochemistry.** *N*-(But-3-en-2-yl)-4-methylbenzenesulfonamide (**10**) was prepared by a semi-preparative enzymatic reaction. Two whole cell bioconversions were performed using 16 mL cells overexpressing variant P-5, resuspended to  $OD_{600} = 10$  in M9-N. To the degassed cells in an anaerobic chamber were added

the oxygen depletion system (1.0 mL), glucose (2.0 mL, 250 mM in M9-N), sulfide Z-1 (500  $\mu$ L, 200 mM in DMSO), and tosyl azide (500  $\mu$ L, 200 mM in DMSO). After 18 h, the reactions were diluted with 20 mL acetonitrile and 1.5 mL DTT solution (20 mM in 0.1 M KPi) and then centrifuged (5,000 rpm, 10 min). The supernatants were combined, extracted with EtOAc (2 x 30 mL), and the organic layers were washed with brine (20 mL), dried over MgSO<sub>4</sub>, filtered, concentrated, and purified by silica gel column chromatography (eluting with 20% EtOAc in hexanes). The product was isolated (32.0 mg, 71% yield, 6100 TTN, 71% ee) and found to have  $[\alpha]_D^{25} -3.7$  ( $c = 1.14$  in CHCl<sub>3</sub>). Based on the rotations and assignments of this compound made by Murakami *et al.*<sup>9</sup> and Moriwake *et al.*,<sup>13</sup> the enzymatically produced compound is assigned as the (*S*) enantiomer. Other allylic amine products (**14** and **15**) were assigned by analogy.

In addition, Boc-L-alanine methyl ester was derivatized according to the procedures of Moriwake *et al.*<sup>13</sup> and Velmourougane *et al.*,<sup>14</sup> providing **10** as the (*S*) enantiomer. The enantiopurity of the material was eroded to 68% ee during the reaction sequence, but the major peak matched that observed in the P411-catalyzed reactions, confirming assignment of the enzymatic product as the (*S*) enantiomer.

*S*-Ethyl-*S*-phenyl-*N*-(4-methylbenzenesulfonyl) sulfimide (**12**) was prepared racemically and separated by chiral HPLC to >99% ee using a Chiralcel OJ-H column. The enantiomer formed preferentially by variant P-5, which elutes first on the Chiralcel OJ-H column (using 12% isopropanol, SFC chromatography), was found to have  $[\alpha]_D^{25} -248.2$  ( $c = 0.38$  in CHCl<sub>3</sub>). Based on the rotation and assignment of this compound made by Wang *et al.*,<sup>10a</sup> the enzymatically produced compound is assigned as the (*S*) enantiomer.



*S*-(*n*-Propyl)-*S*-phenyl-*N*-(4-methylbenzenesulfonyl)sulfimide (**18**) was prepared by a semi-preparative enzymatic reaction. Two whole cell bioconversions were performed using 12.8 mL cells overexpressing variant P-5, resuspended to  $OD_{600} = 10$  in M9-N. To the degassed cells in an anaerobic chamber were added the oxygen depletion system (800  $\mu$ L), glucose (1.6 mL, 250 mM in M9-N), phenyl *n*-propyl sulfide (400  $\mu$ L, 300 mM in DMSO), and tosyl azide (400  $\mu$ L, 300 mM in DMSO). After 18 h, the reactions were diluted with 16 mL acetonitrile and centrifuged (5,000 rpm, 10 min). The supernatants were combined, extracted with EtOAc (2 x 30 mL), and the organic layers were washed with brine (20 mL), dried over  $MgSO_4$ , filtered, concentrated, and purified by silica gel column chromatography (eluting with 50% EtOAc in hexanes). The product was isolated (41.2 mg, 53% yield, 6100 TTN, >99% ee) and found to have  $[\alpha]_D^{25} -277.2$  ( $c = 0.44$  in  $CHCl_3$ ). Based on the rotation and assignment of this compound made by Wang *et al.*,<sup>10a</sup> the enzymatically produced compound is assigned as the (*S*) enantiomer. The absolute stereochemistry of *S*-(*n*-butyl)-*S*-phenyl-*N*-(4-methylbenzenesulfonyl)sulfimide (**19**) was assigned by analogy.

**HPLC Calibration:** Calibration curves with an internal standard were created for HPLC analysis of reaction products.

*S*-Methyl-*S*-phenyl-*N*-(4-methylbenzenesulfonyl)sulfimide (**11**), with 1.25 mM 1,3,5-trimethoxybenzene as internal standard, at 230 nm.

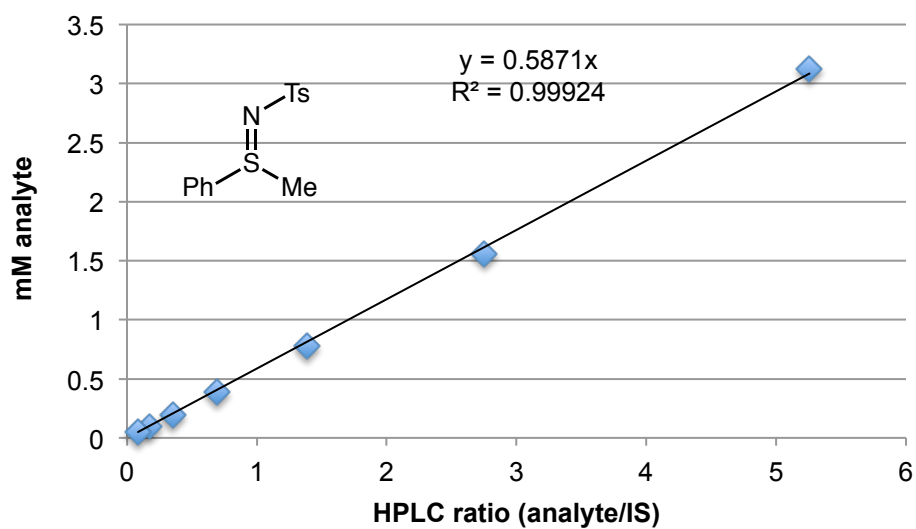

*S*-Ethyl-*S*-phenyl-*N*-(4-methylbenzenesulfonyl)sulfimide (**12**), with 1.25 mM 1,3,5-trimethoxybenzene as internal standard, at 230 nm.

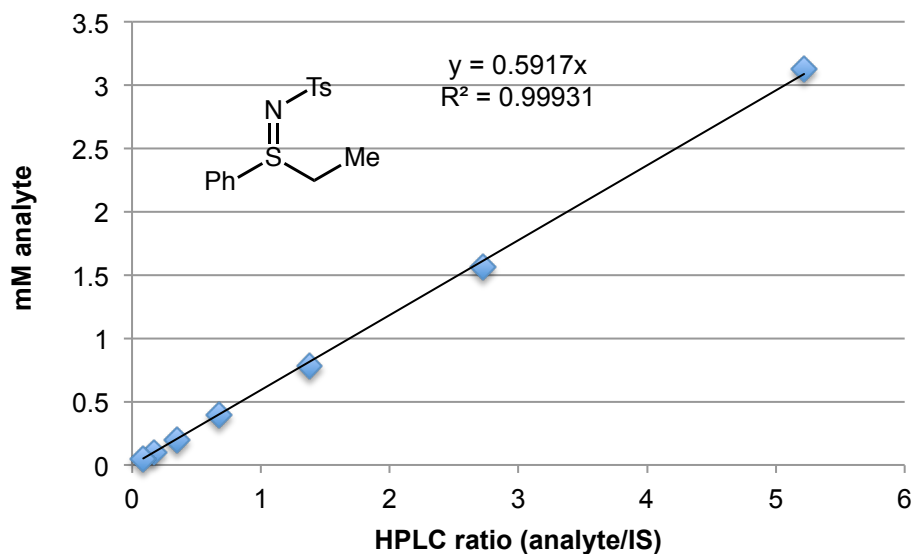

*N*-Allyl-4-methylbenzenesulfonamide (**13**), with 0.25 mM 1,3,5-trimethoxybenzene as internal standard, at 230 nm.

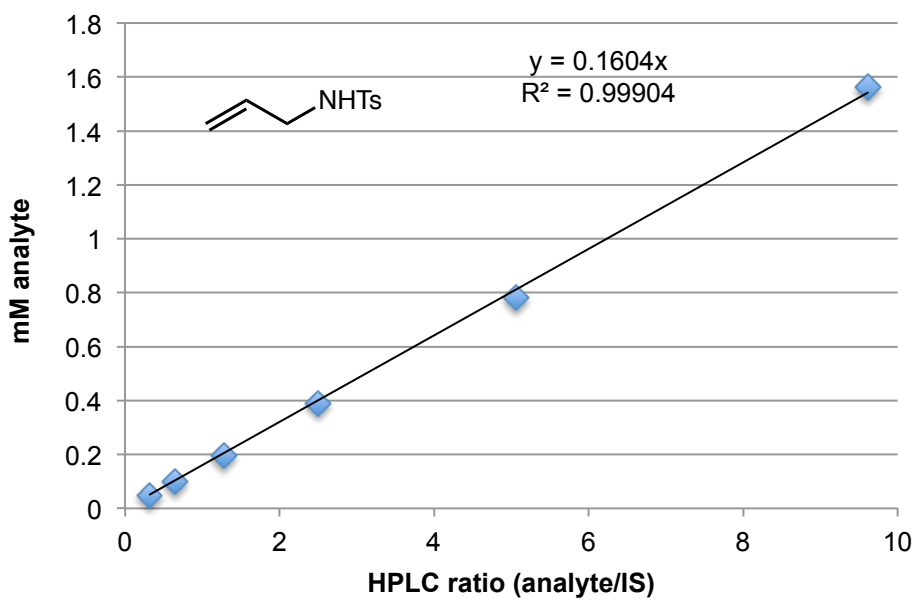

*N*-(But-3-en-2-yl)-4-methylbenzenesulfonamide (**10**), with 1.25 mM 4-ethylanisole as internal standard, at 230 nm.

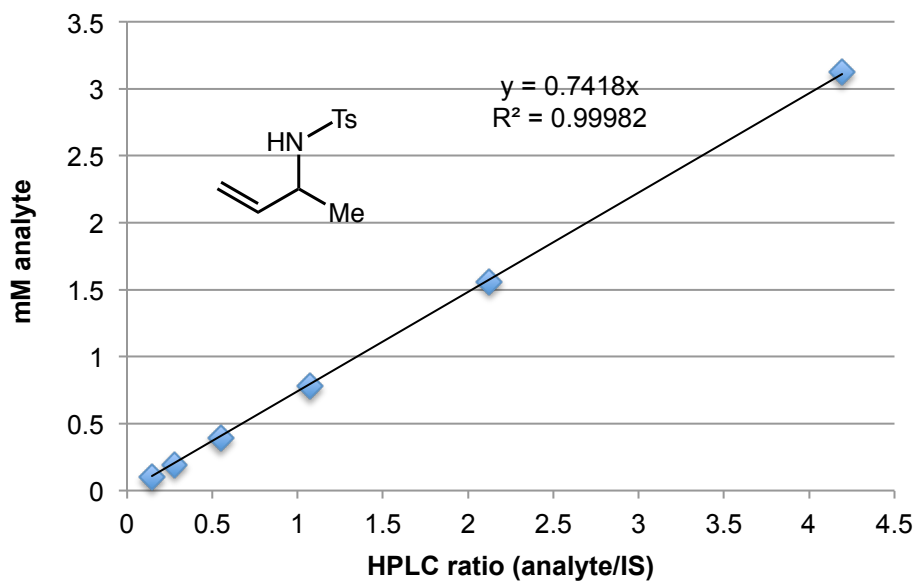

*N*-(Pent-1-en-3-yl)-4-methylbenzenesulfonamide (**14**), with 0.25 mM 1,3,5-trimethoxybenzene as internal standard, at 230 nm.

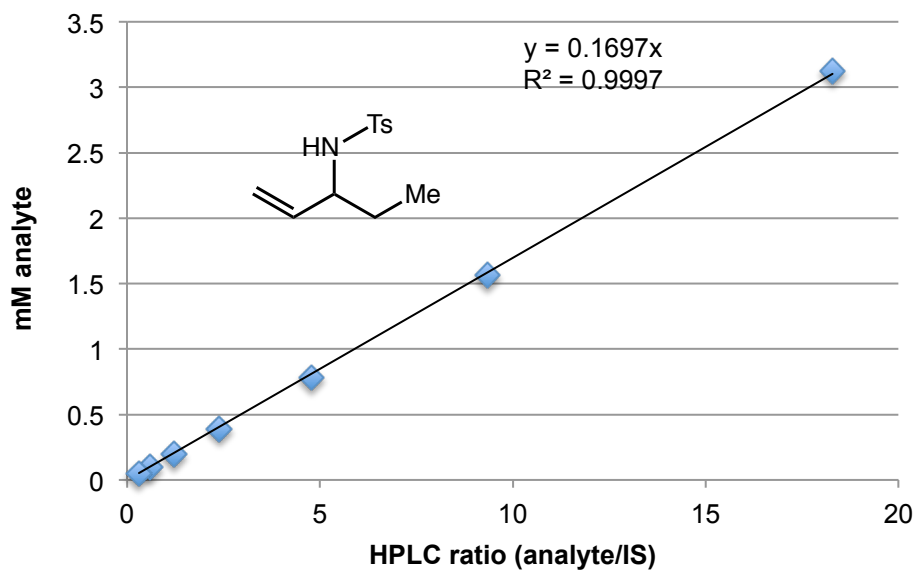

*N*-(Hex-1-en-3-yl)-4-methylbenzenesulfonamide (**15**), with 0.25 mM 1,3,5-trimethoxybenzene as internal standard, at 230 nm.

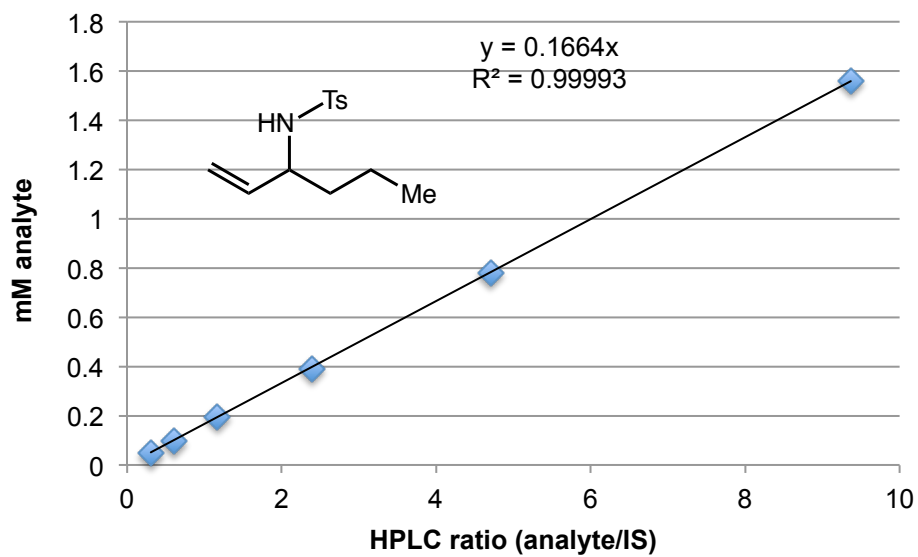

*N*-(2-Methylallyl)-4-methylbenzenesulfonamide (**16**), with 1.25 mM 3-phenyl-1-propanol as internal standard, at 210 nm.

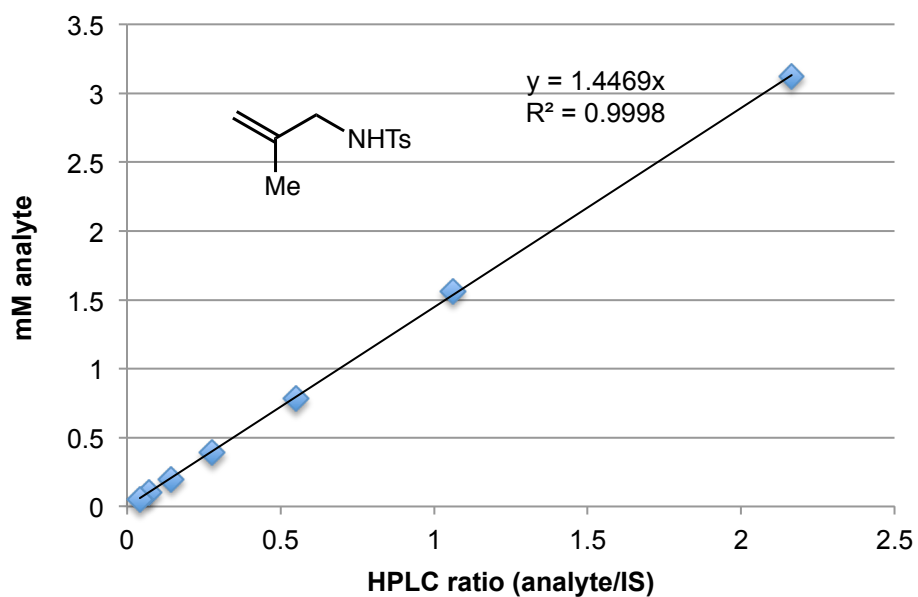

*N*-(2-Methylbut-3-en-2-yl)-4-methylbenzenesulfonamide (**17**), with 0.25 mM 1,3,5-trimethoxybenzene as internal standard, at 230 nm.

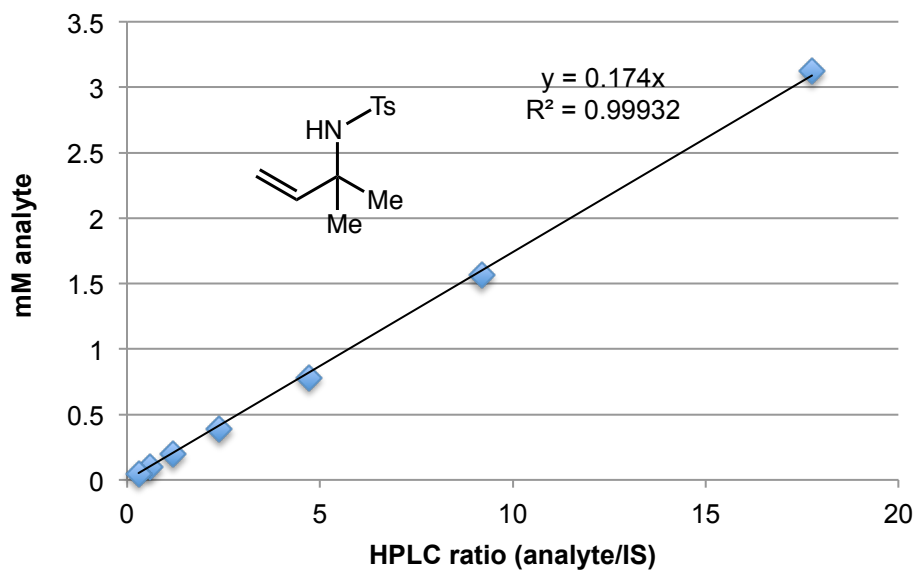

*S*-(*n*-Propyl)-*S*-phenyl-*N*-(4-methylbenzenesulfonyl)sulfimide (**18**) with 1.25 mM 3-phenyl-1-propanol as internal standard, at 210 nm.

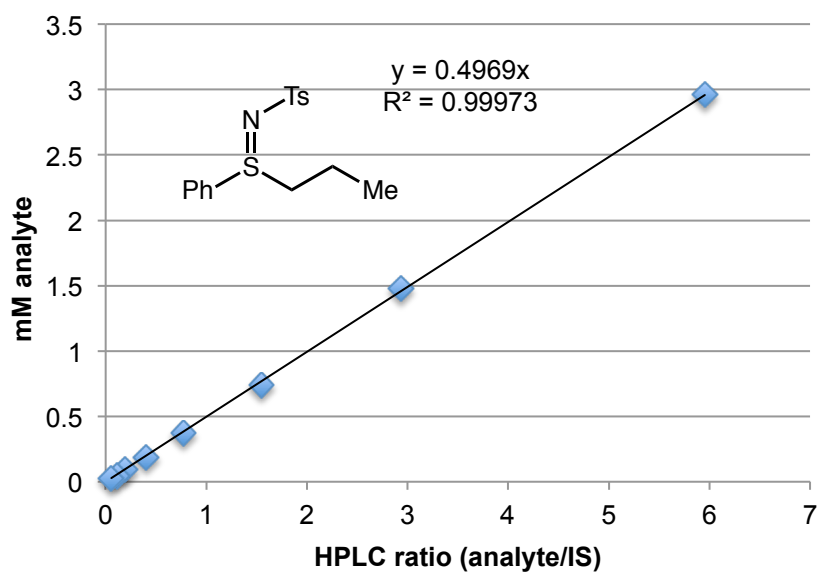

*S*-(*n*-Butyl)-*S*-phenyl-*N*-(4-methylbenzenesulfonyl)sulfimide (**19**) with 1.25 mM 3-phenyl-1-propanol as internal standard, at 210 nm.

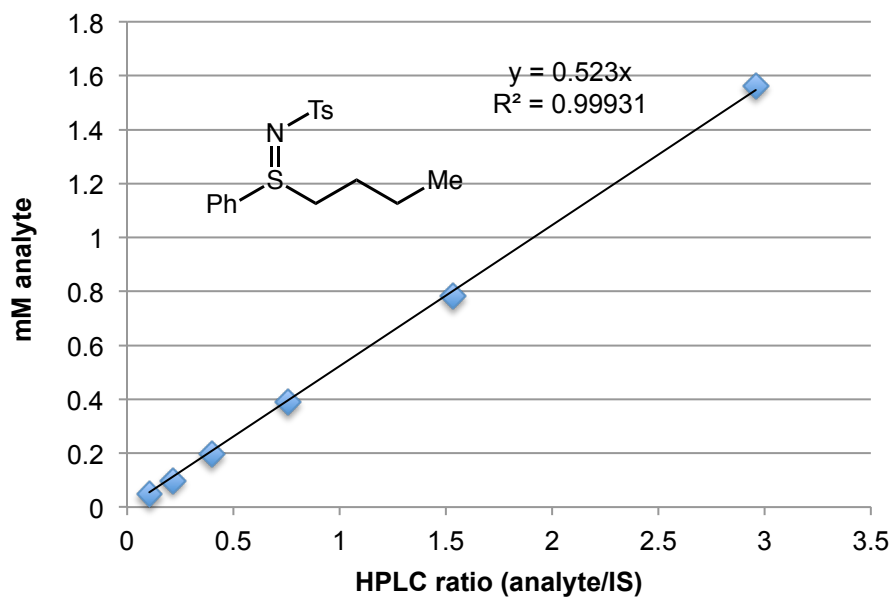

**HPLC co-injections of reaction mixtures with chemically synthesized authentic products.**

*S*-Methyl-*S*-phenyl-*N*-(4-methylbenzenesulfonyl)sulfinamide (**11**), synthetic:

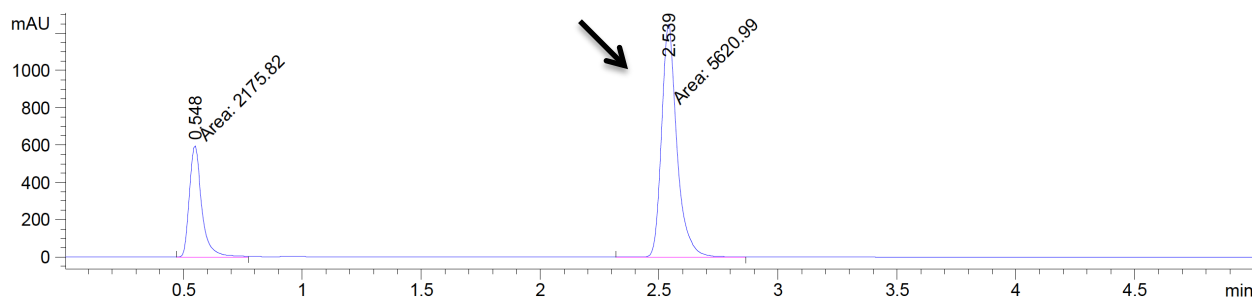

Enzymatic:

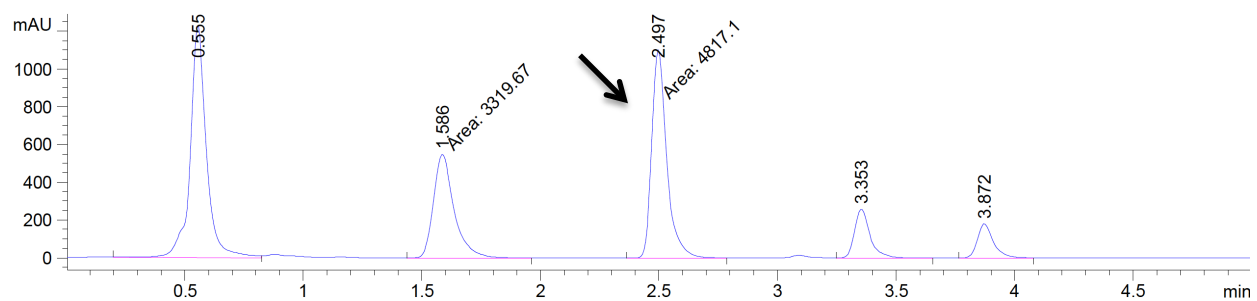

Co-injection:

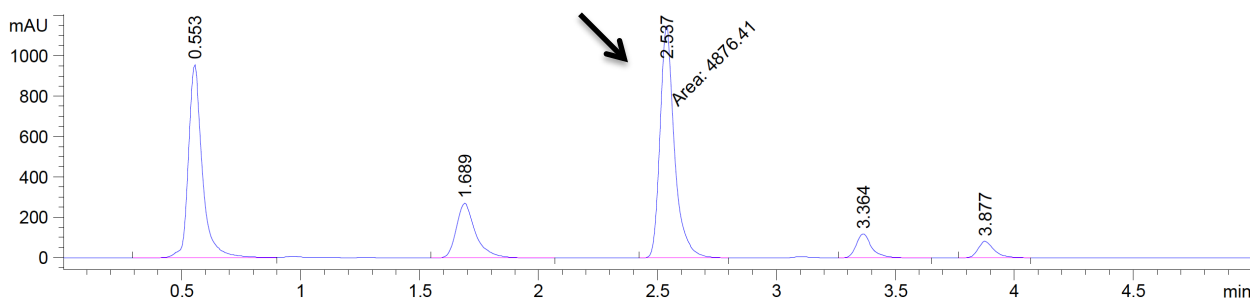



*S*-Ethyl-*S*-phenyl-*N*-(4-methylbenzenesulfonyl)sulfimide (**12**), synthetic:

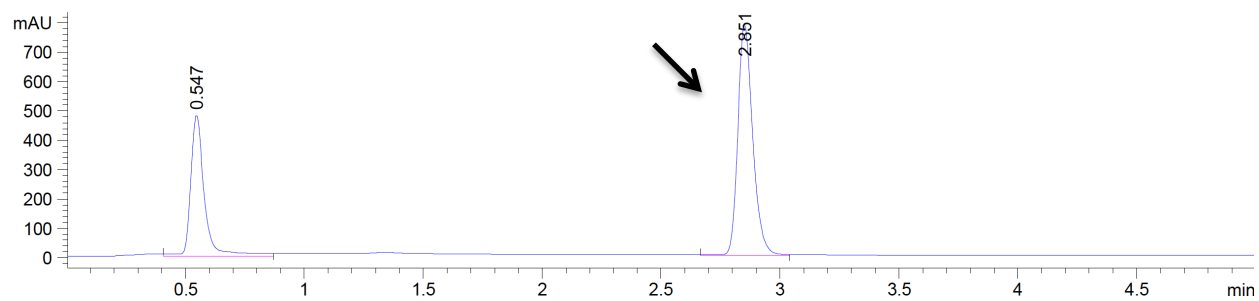

Enzymatic:

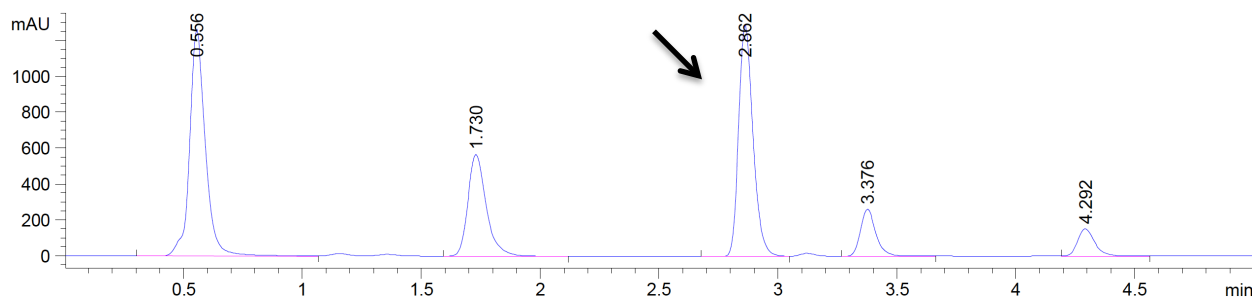

Co-injection:

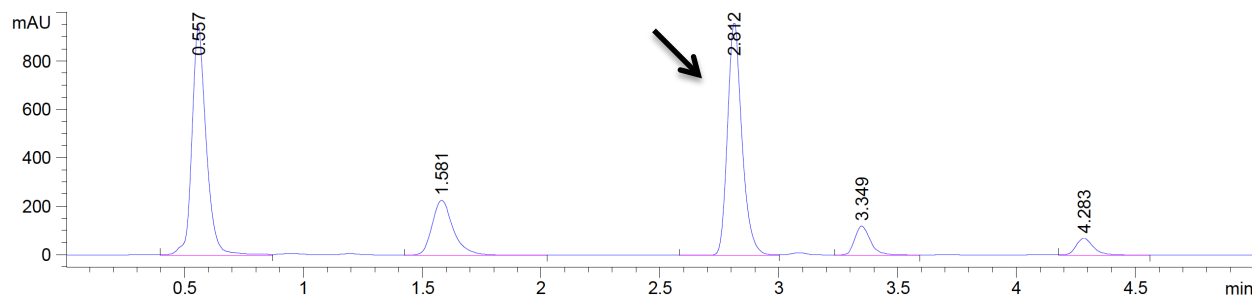

*N*-Allyl-4-methylbenzenesulfonamide (**13**), synthetic:

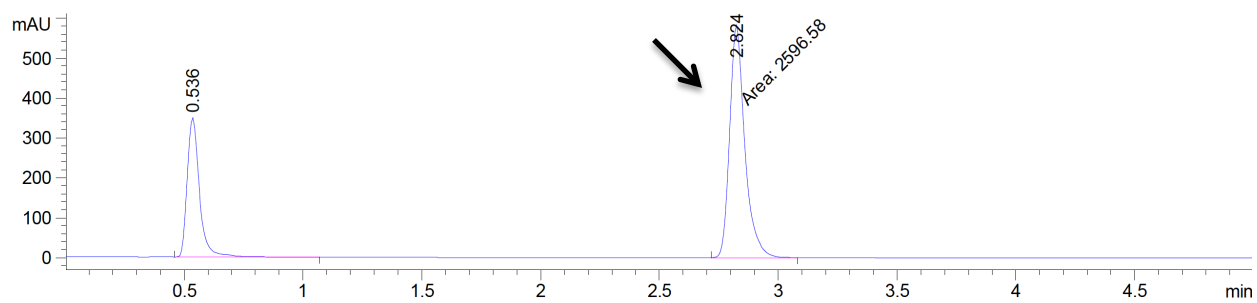

Enzymatic:

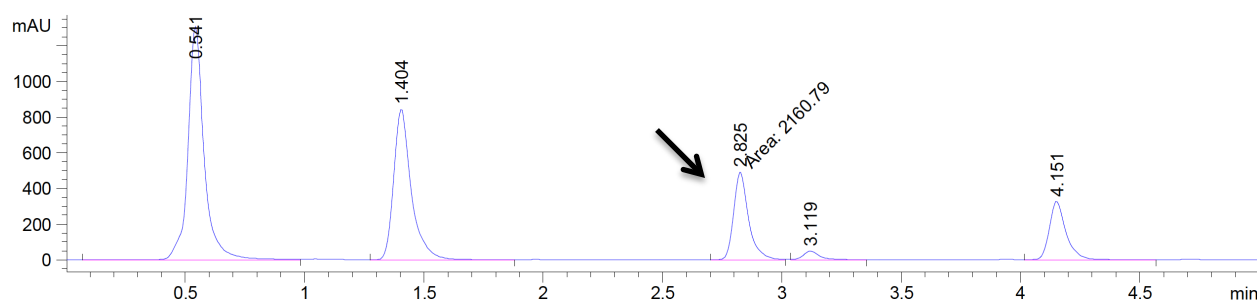

Co-injection:

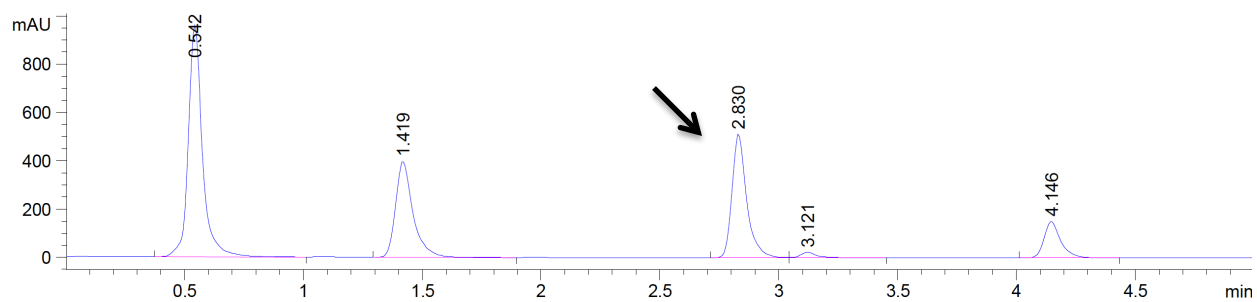

*N*-(But-3-en-2-yl)-4-methylbenzenesulfonamide (**10**), synthetic:

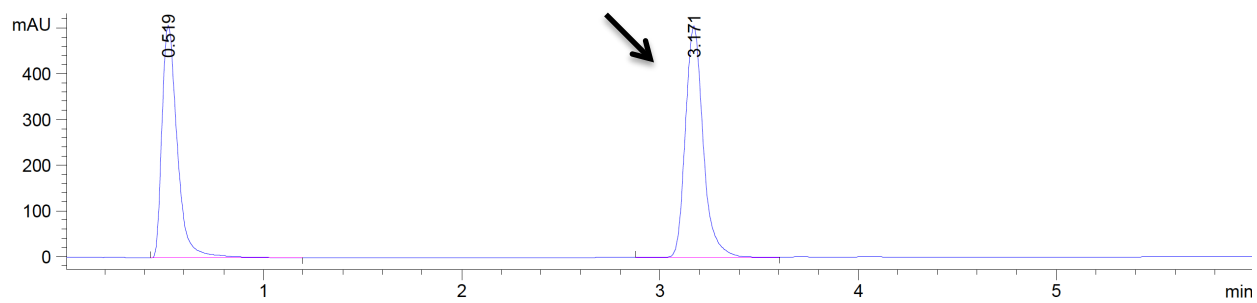

Enzymatic:

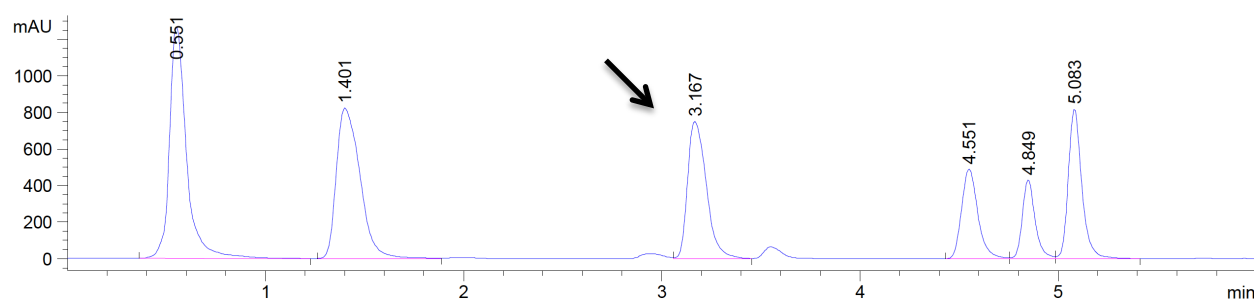

Co-injection:

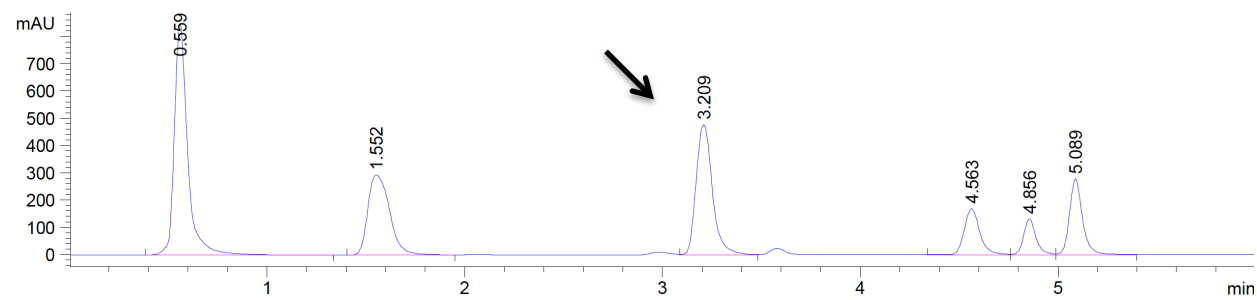

*N*-(Pent-1-en-3-yl)-4-methylbenzenesulfonamide (**14**), synthetic:

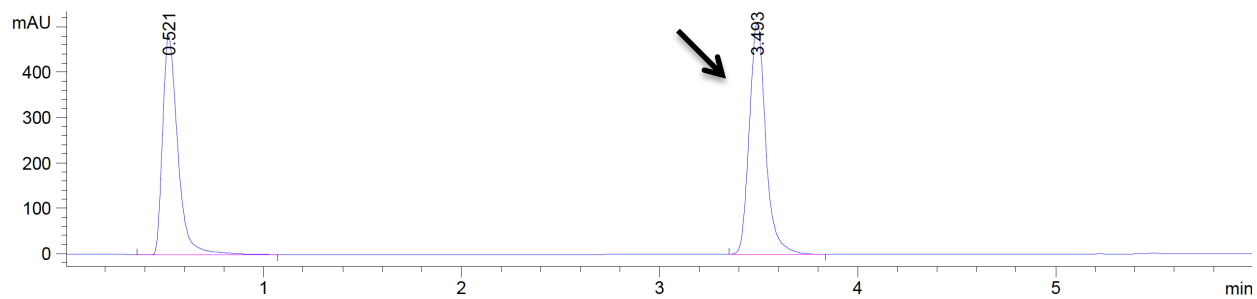

Enzymatic:

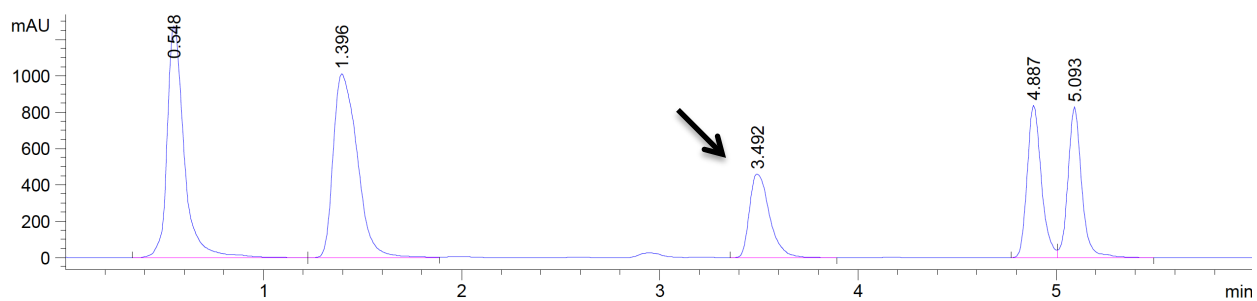

Co-injection:

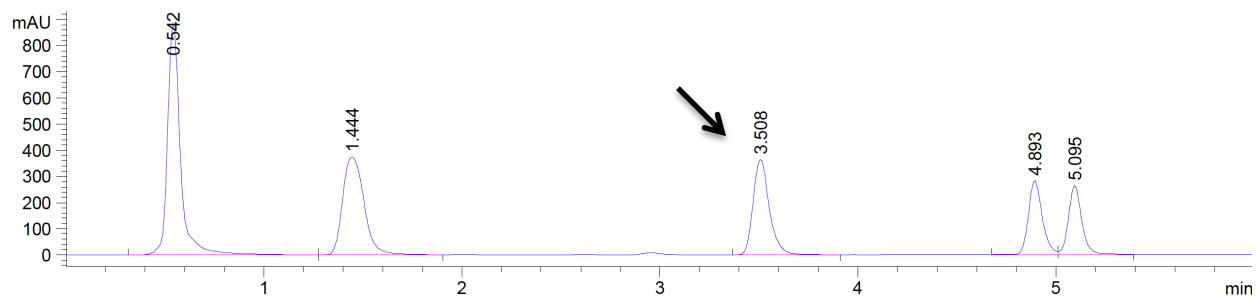

*N*-(Hex-1-en-3-yl)-4-methylbenzenesulfonamide (**15**), synthetic:

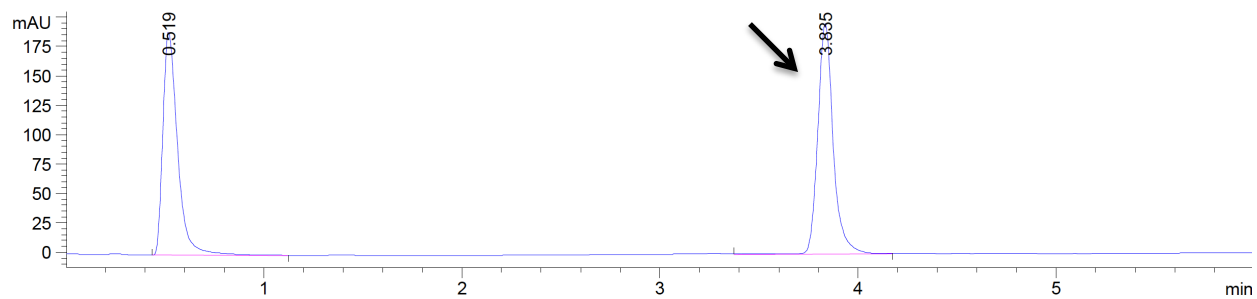

Enzymatic:

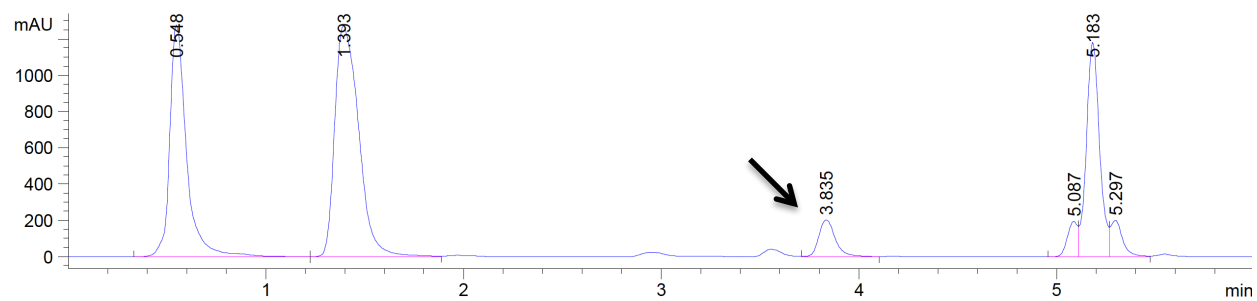

Co-injection:

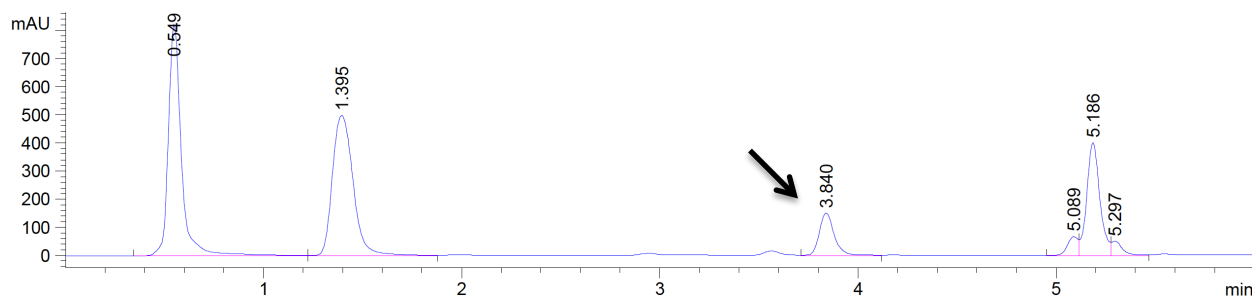

*N*-(2-Methylallyl)-4-methylbenzenesulfonamide (**16**), synthetic:

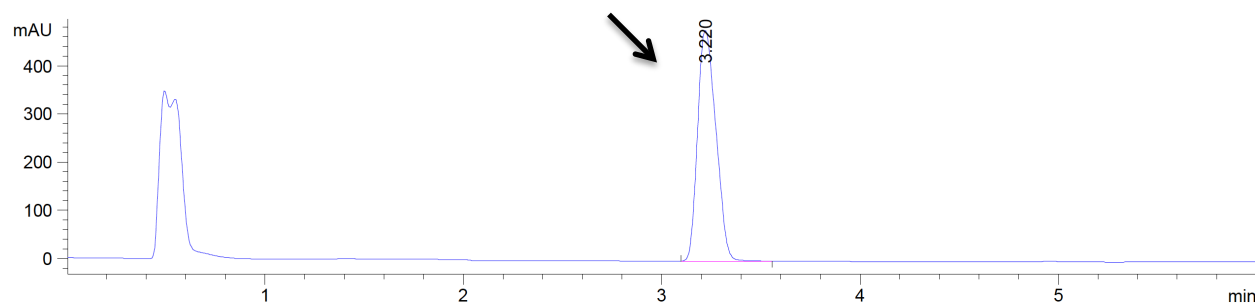

Enzymatic:

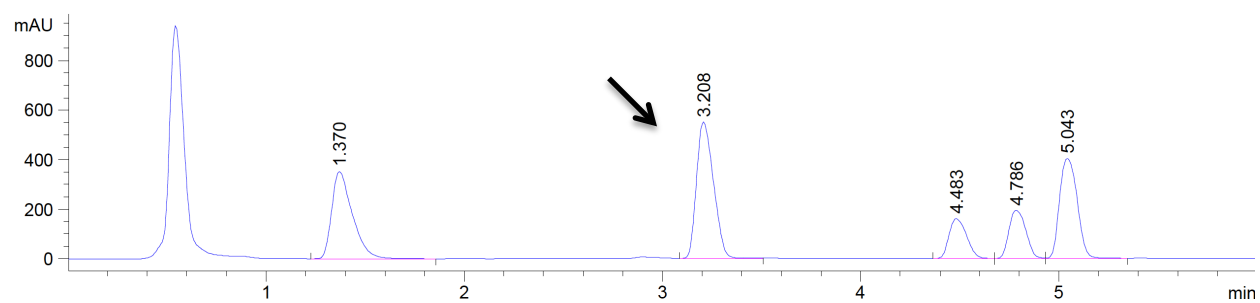

Co-injection:

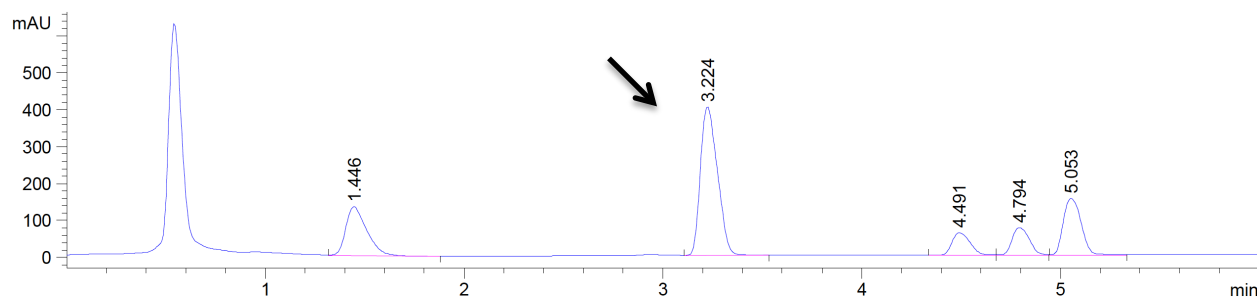

*N*-(2-Methylbut-3-en-2-yl)-4-methylbenzenesulfonamide (**17**), synthetic:

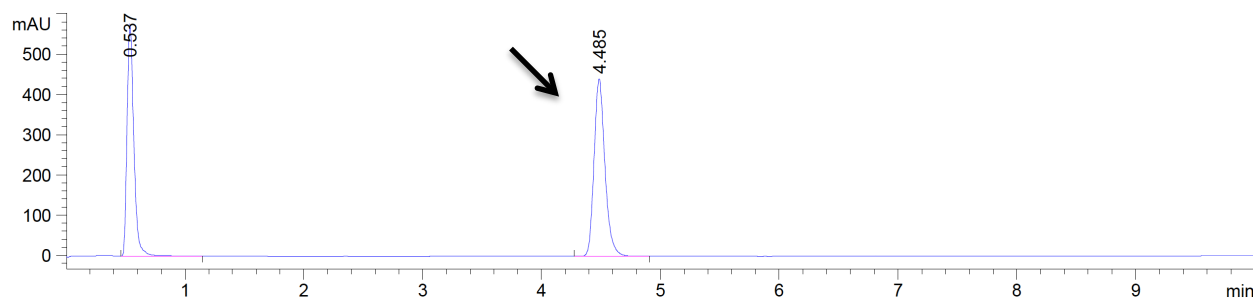

Enzymatic:

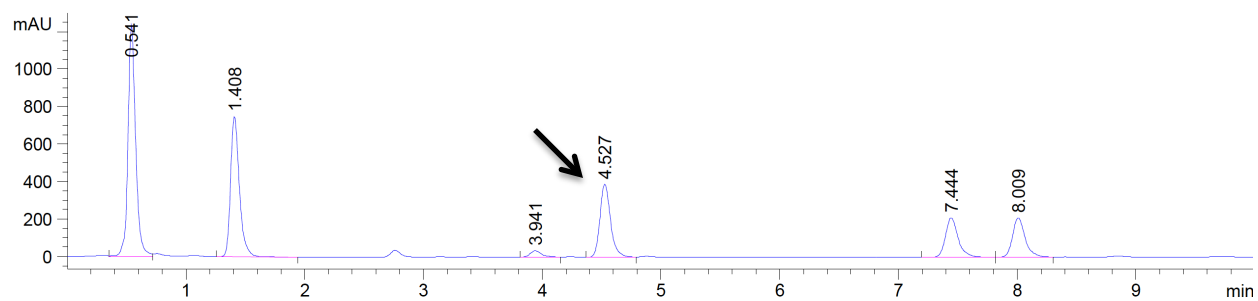

Co-injection:

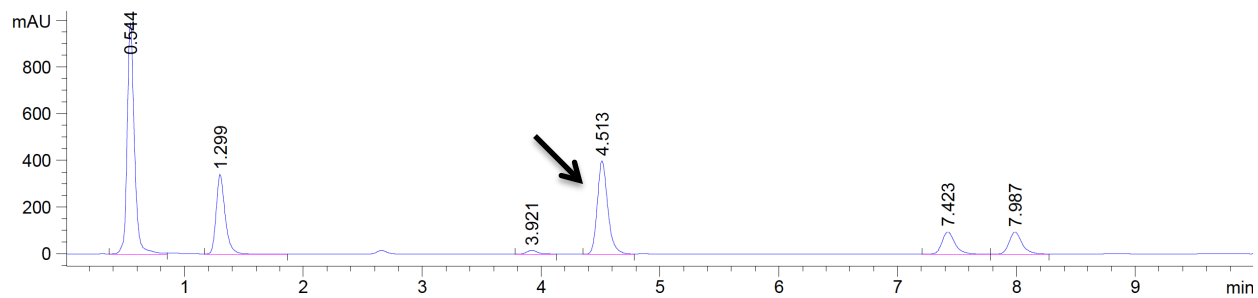

*S*-(*n*-Propyl)-*S*-phenyl-*N*-(4-methylbenzenesulfonyl)sulfimide (**18**), synthetic:

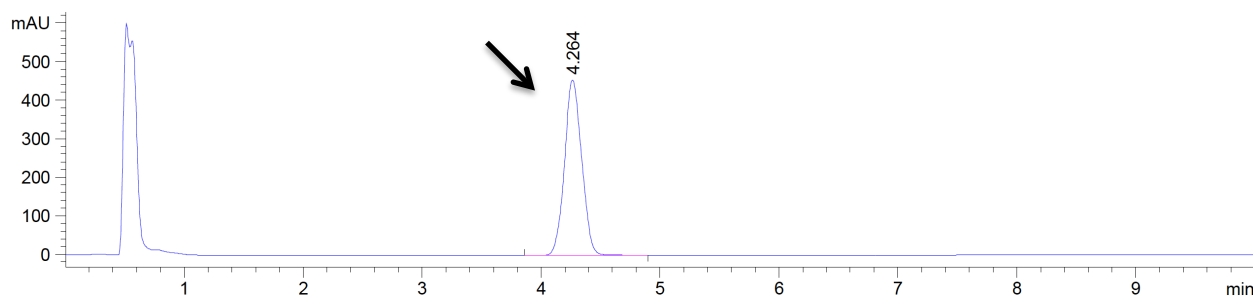

Enzymatic:

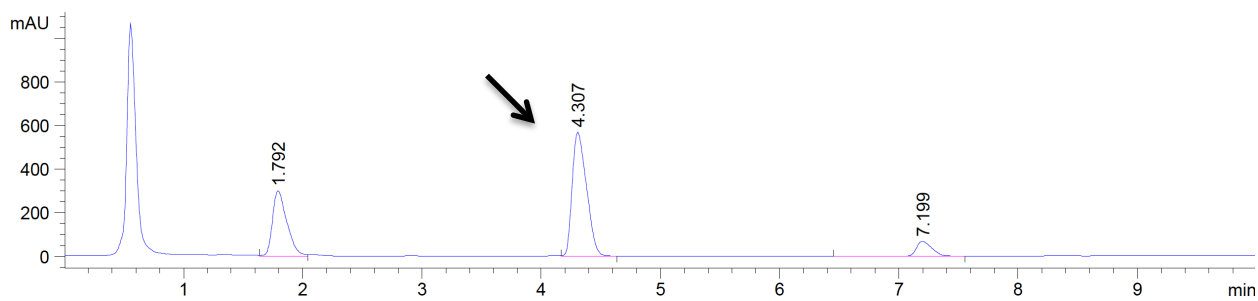

Co-injection:

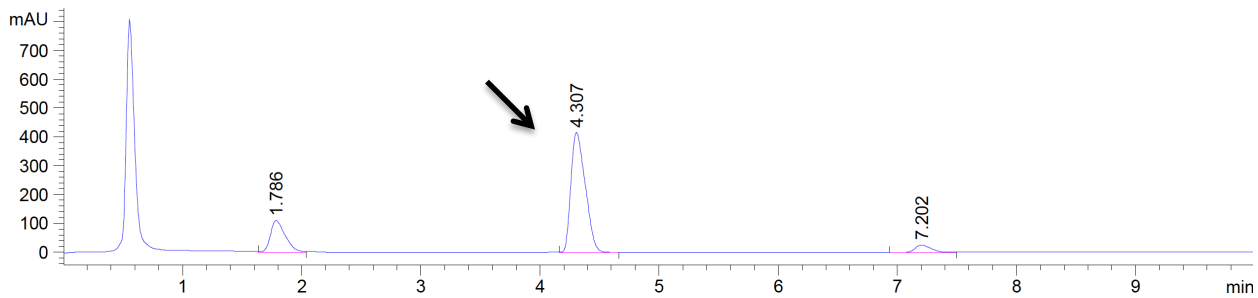



*S*-(*n*-Butyl)-*S*-phenyl-*N*-(4-methylbenzenesulfonyl)sulfimide (**19**), synthetic:

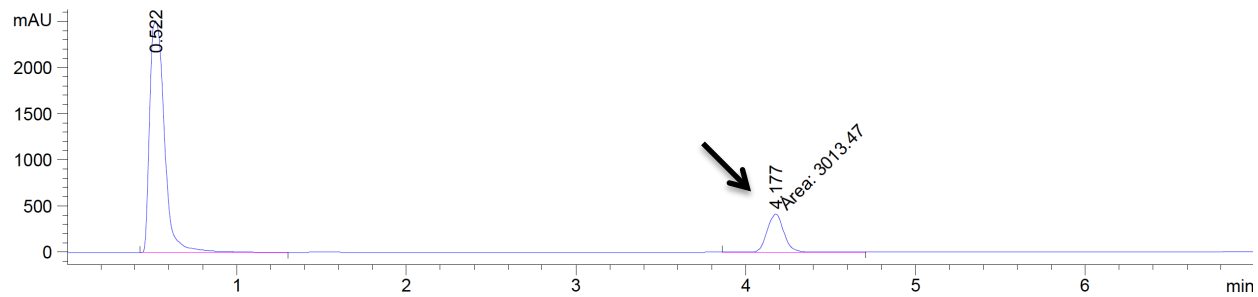

Enzymatic:

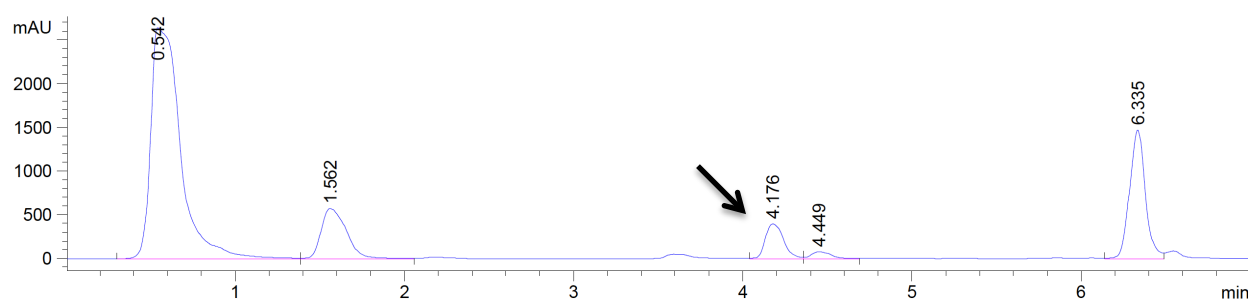

Co-injection:

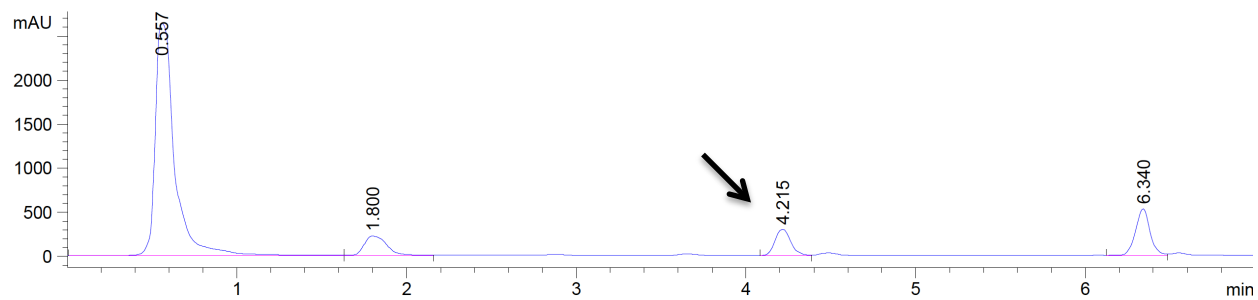

### Determination of enantioselectivity.

For chiral HPLC analysis, reaction mixtures were extracted with ethyl acetate, dried, and concentrated. For the sulfimidation of phenyl ethyl sulfide (**6**), the material was dissolved in 20% isopropanol in hexanes and analyzed directly by SFC for enantioselectivity. All other products were dissolved in acetonitrile and purified by C18 semi-preparative HPLC. The purified material was dried, dissolved in 20% isopropanol in hexanes, and analyzed by SFC for enantioselectivity.

**Enantioselectivity for enzyme-catalyzed formation of *N*-(but-3-en-2-yl)-4-methylbenzene sulfonamide (**10**), from the sulfide **Z-1**.** Measured by SFC chromatography using Chiralpak AS-H (10% isopropanol). Racemic standard:

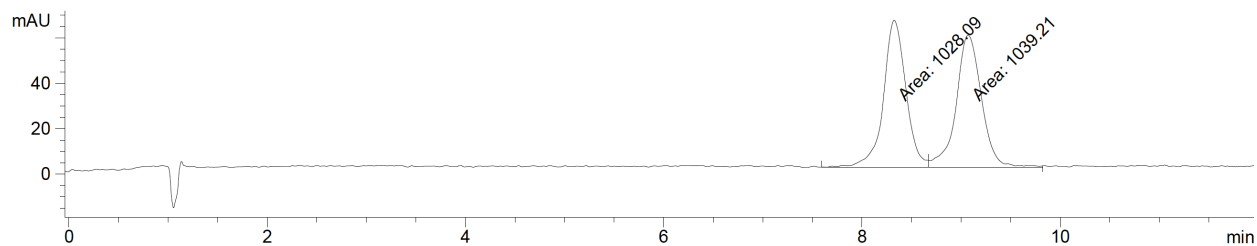

Signal 2: DAD1 B, Sig=235,8 Ref=360,100

| Peak # | RetTime [min] | Type | Width [min] | Area [mAU*s] | Height [mAU] | Area %  |
|--------|---------------|------|-------------|--------------|--------------|---------|
| 1      | 8.326         | MF   | 0.2644      | 1028.09180   | 64.79642     | 49.7312 |
| 2      | 9.071         | FM   | 0.2976      | 1039.20654   | 58.20702     | 50.2688 |

With P-I263F (57% ee):

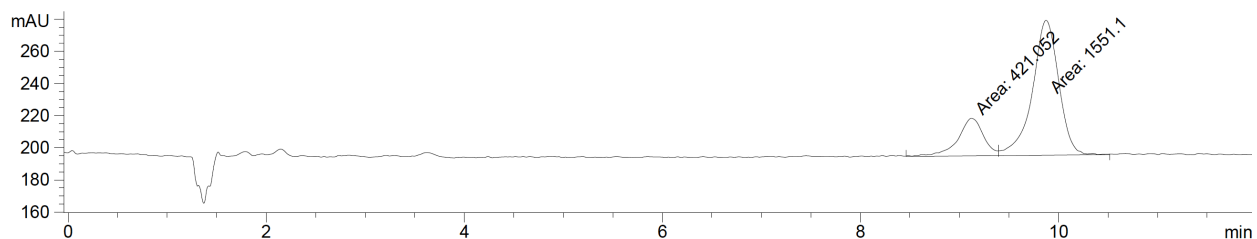

Signal 2: DAD1 B, Sig=235,8 Ref=360,100

| Peak # | RetTime [min] | Type | Width [min] | Area [mAU*s] | Height [mAU] | Area %  |
|--------|---------------|------|-------------|--------------|--------------|---------|
| 1      | 9.121         | MF   | 0.3002      | 421.05237    | 23.37282     | 21.3499 |
| 2      | 9.875         | FM   | 0.3082      | 1551.09827   | 83.87534     | 78.6501 |

With P-I263F V87A (47% ee):

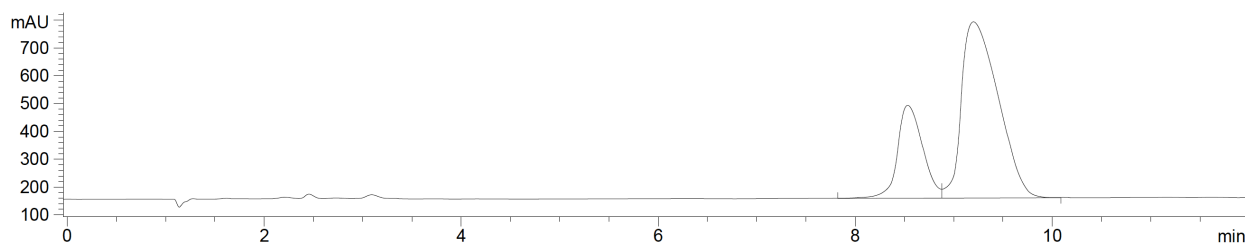

Signal 2: DAD1 B, Sig=235,8 Ref=360,100

| Peak # | RetTime [min] | Type | Width [min] | Area [mAU*s] | Height [mAU] | Area %  |
|--------|---------------|------|-------------|--------------|--------------|---------|
| 1      | 8.533         | VV   | 0.2775      | 5942.06885   | 334.16473    | 26.6094 |
| 2      | 9.201         | VB   | 0.4119      | 1.63886e4    | 633.26636    | 73.3906 |

With P-I263F A328V (66% ee):

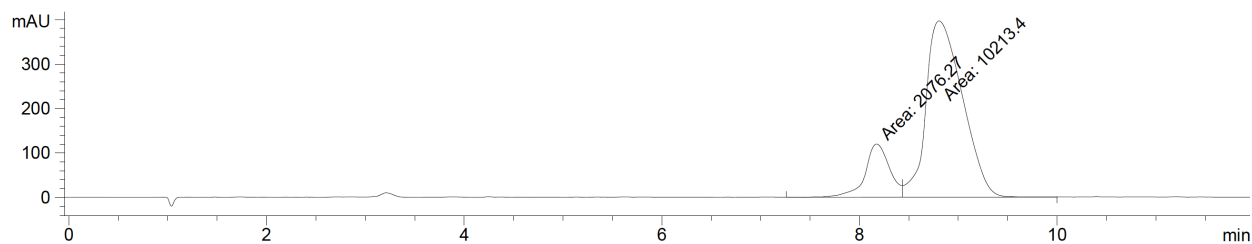

Signal 2: DAD1 B, Sig=235,8 Ref=360,100

| Peak # | RetTime [min] | Type | Width [min] | Area [mAU*s] | Height [mAU] | Area %  |
|--------|---------------|------|-------------|--------------|--------------|---------|
| 1      | 8.173         | MF   | 0.2890      | 2076.27002   | 119.74593    | 16.8944 |
| 2      | 8.806         | FM   | 0.4294      | 1.02134e4    | 396.39926    | 83.1056 |

With P-I263F V87A A328V (66% ee):

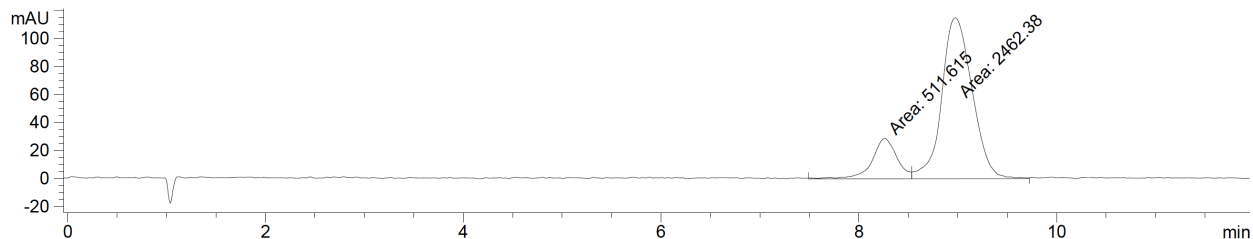

Signal 2: DAD1 B, Sig=235,8 Ref=360,100

| Peak # | RetTime [min] | Type | Width [min] | Area [mAU*s] | Height [mAU] | Area %  |
|--------|---------------|------|-------------|--------------|--------------|---------|
| 1      | 8.261         | MF   | 0.2935      | 511.61548    | 29.04813     | 17.2030 |
| 2      | 8.973         | FM   | 0.3573      | 2462.37500   | 114.85909    | 82.7970 |

With P-I263F V87A A328V A268G (66% ee):

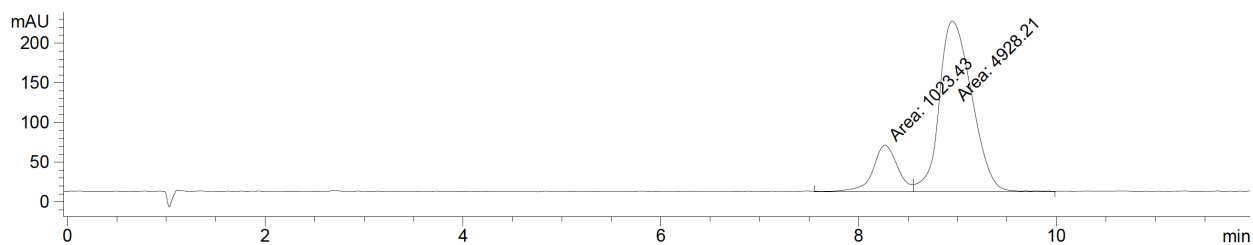

Signal 2: DAD1 B, Sig=235,8 Ref=360,100

| Peak # | RetTime [min] | Type | Width [min] | Area [mAU*s] | Height [mAU] | Area %  |
|--------|---------------|------|-------------|--------------|--------------|---------|
| 1      | 8.267         | MF   | 0.2892      | 1023.42816   | 58.98339     | 17.1957 |
| 2      | 8.950         | FM   | 0.3816      | 4928.21045   | 215.23618    | 82.8043 |

With P-I263F V87A A328V A268G A82L (69% ee):

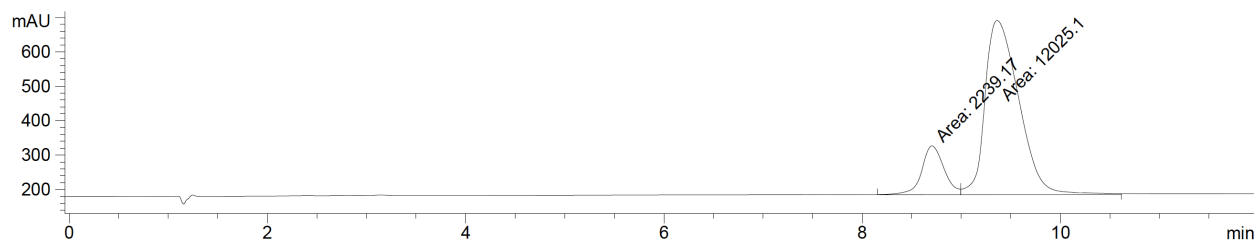

Signal 2: DAD1 B, Sig=235,8 Ref=360,100

| Peak # | RetTime [min] | Type | Width [min] | Area [mAU*s] | Height [mAU] | Area %  |
|--------|---------------|------|-------------|--------------|--------------|---------|
| 1      | 8.704         | MF   | 0.2627      | 2239.16846   | 142.06618    | 15.6977 |
| 2      | 9.363         | FM   | 0.3958      | 1.20251e4    | 506.30499    | 84.3023 |

With P-I263F V87A A328V A268G A82I (68% ee):

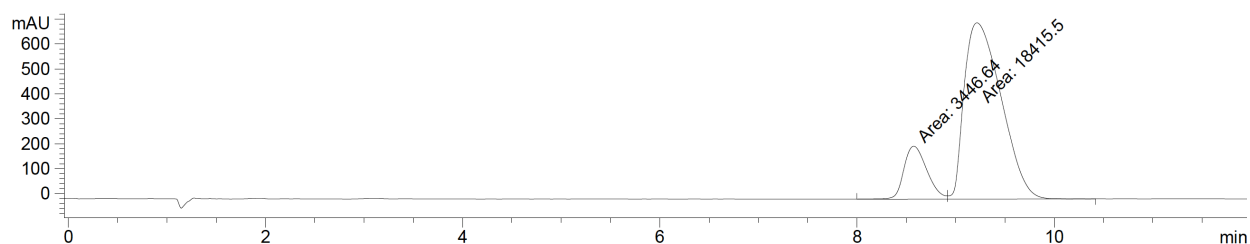

Signal 2: DAD1 B, Sig=235,8 Ref=360,100

| Peak # | RetTime [min] | Type | Width [min] | Area [mAU*s] | Height [mAU] | Area %  |
|--------|---------------|------|-------------|--------------|--------------|---------|
| 1      | 8.575         | MF   | 0.2704      | 3446.63818   | 212.41125    | 15.7653 |
| 2      | 9.217         | FM   | 0.4341      | 1.84155e4    | 706.99561    | 84.2347 |

**Enantioselectivity for enzyme-catalyzed formation of *N*-(pent-1-en-3-yl)-4-methylbenzene sulfonamide (14).** Measured by SFC chromatography using Chiralpak AS-H (20% isopropanol).

Racemic standard:

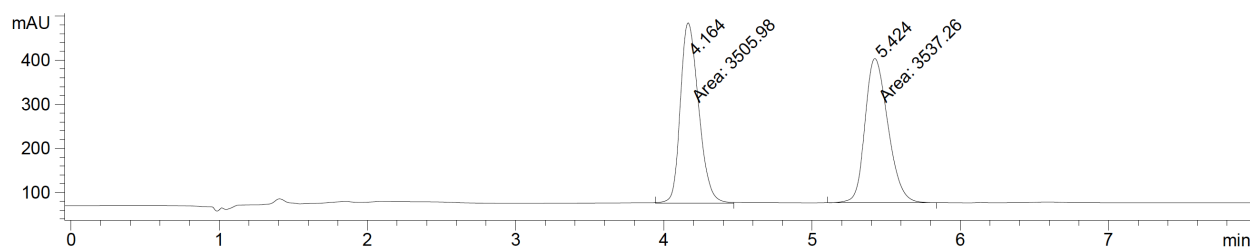

Signal 1: DAD1 A, Sig=210,8 Ref=360,100

| Peak # | RetTime [min] | Type | Width [min] | Area [mAU*s] | Height [mAU] | Area %  |
|--------|---------------|------|-------------|--------------|--------------|---------|
| 1      | 4.164         | MM   | 0.1429      | 3505.97510   | 408.89801    | 49.7779 |
| 2      | 5.424         | MF   | 0.1800      | 3537.25537   | 327.43335    | 50.2221 |

With P-I263F V87A A328V A268G (71% ee):

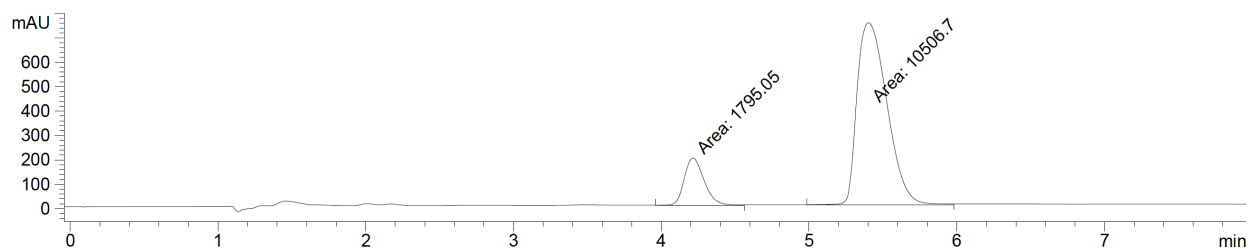

Signal 1: DAD1 A, Sig=210,8 Ref=360,100

| Peak # | RetTime [min] | Type | Width [min] | Area [mAU*s] | Height [mAU] | Area %  |
|--------|---------------|------|-------------|--------------|--------------|---------|
| 1      | 4.214         | MM   | 0.1545      | 1795.04980   | 193.69081    | 14.5919 |
| 2      | 5.402         | MM   | 0.2348      | 1.05067e4    | 745.76099    | 85.4081 |

With P-I263F V87A A328V A268G A82I (82% ee):

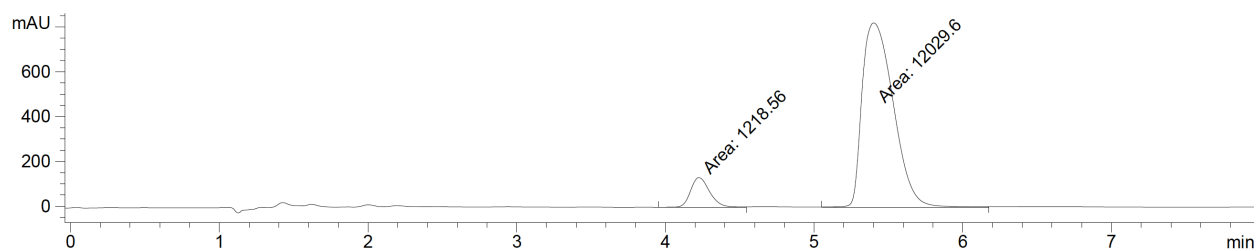

Signal 1: DAD1 A, Sig=210,8 Ref=360,100

| Peak # | RetTime [min] | Type | Width [min] | Area [mAU*s] | Height [mAU] | Area %  |
|--------|---------------|------|-------------|--------------|--------------|---------|
| 1      | 4.225         | MM   | 0.1518      | 1218.56250   | 133.75122    | 9.1980  |
| 2      | 5.401         | MM   | 0.2437      | 1.20296e4    | 822.57532    | 90.8020 |

**Enantioselectivity for enzyme-catalyzed formation of *N*-(hex-1-en-3-yl)-4-methylbenzene sulfonamide (15).** Measured by SFC chromatography using Chiralpak AS-H (20% isopropanol).

Racemic standard:

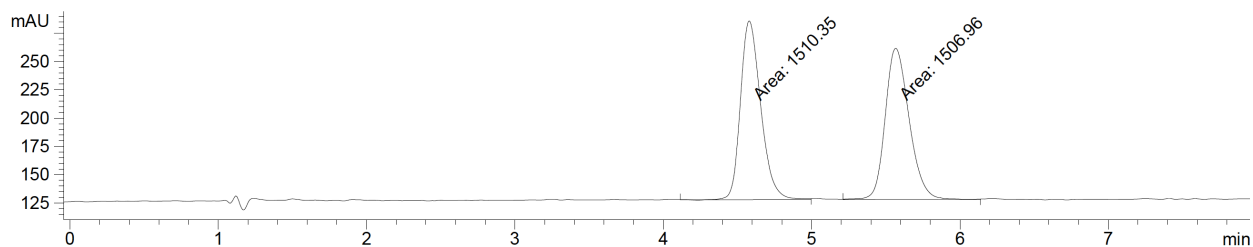

Signal 1: DAD1 A, Sig=210,8 Ref=360,100

| Peak # | RetTime [min] | Type | Width [min] | Area [mAU*s] | Height [mAU] | Area %  |
|--------|---------------|------|-------------|--------------|--------------|---------|
| 1      | 4.579         | MF   | 0.1590      | 1510.34705   | 158.28397    | 50.0561 |
| 2      | 5.567         | FM   | 0.1876      | 1506.96082   | 133.89427    | 49.9439 |

With P-I263F V87A A328V A268G A82I (78% ee):

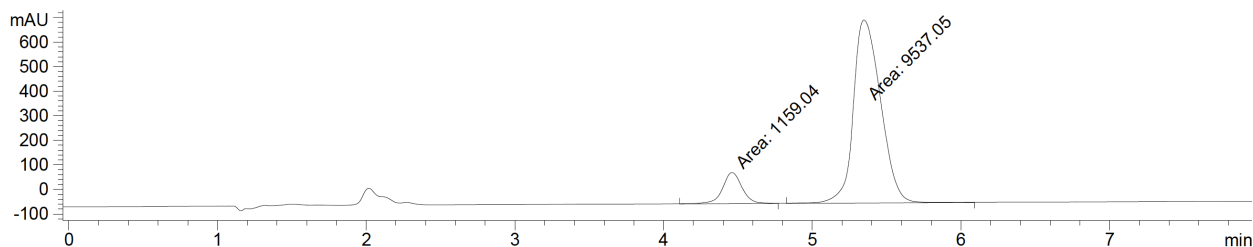

Signal 1: DAD1 A, Sig=210,8 Ref=360,100

| Peak # | RetTime [min] | Type | Width [min] | Area [mAU*s] | Height [mAU] | Area %  |
|--------|---------------|------|-------------|--------------|--------------|---------|
| 1      | 4.460         | FM   | 0.1520      | 1159.04419   | 127.12802    | 10.8361 |
| 2      | 5.348         | FM   | 0.2131      | 9537.04688   | 746.06012    | 89.1639 |

**Enantioselectivity for enzyme-catalyzed formation of *S*-ethyl-*S*-phenyl-*N*-(4-methylbenzene sulfonyl)sulfimide (12).** Measured by SFC chromatography using Chiralcel OJ-H (12% isopropanol). Racemic standard:

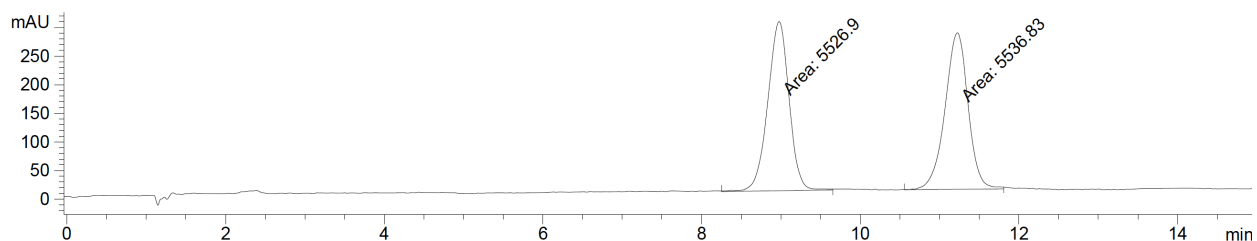

Signal 1: DAD1 A, Sig=210,8 Ref=360,100

| Peak # | RetTime [min] | Type | Width [min] | Area [mAU*s] | Height [mAU] | Area %  |
|--------|---------------|------|-------------|--------------|--------------|---------|
| 1      | 8.977         | MM   | 0.3114      | 5526.89941   | 295.84384    | 49.9551 |
| 2      | 11.224        | MM   | 0.3374      | 5536.82764   | 273.46725    | 50.0449 |

With P-I263F V87A (48% ee):

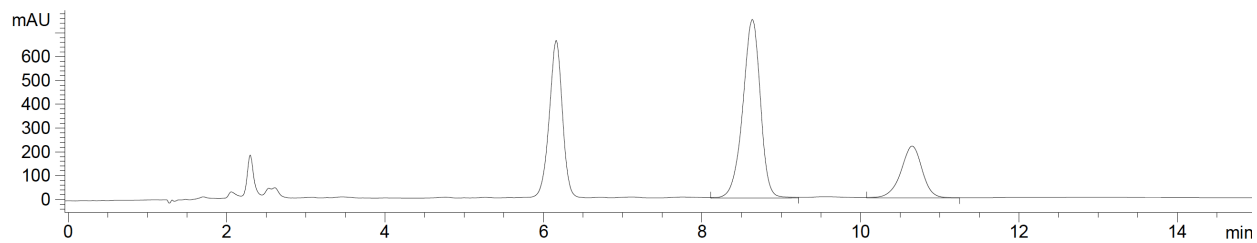

Signal 1: DAD1 A, Sig=210,8 Ref=360,100

| Peak # | RetTime [min] | Type | Width [min] | Area [mAU*s] | Height [mAU] | Area %  |
|--------|---------------|------|-------------|--------------|--------------|---------|
| 1      | 8.637         | VV   | 0.2405      | 1.16016e4    | 749.98163    | 74.0014 |
| 2      | 10.653        | VV   | 0.2824      | 4075.94336   | 217.75298    | 25.9986 |



With P-I263F V87A A328V (82% ee):

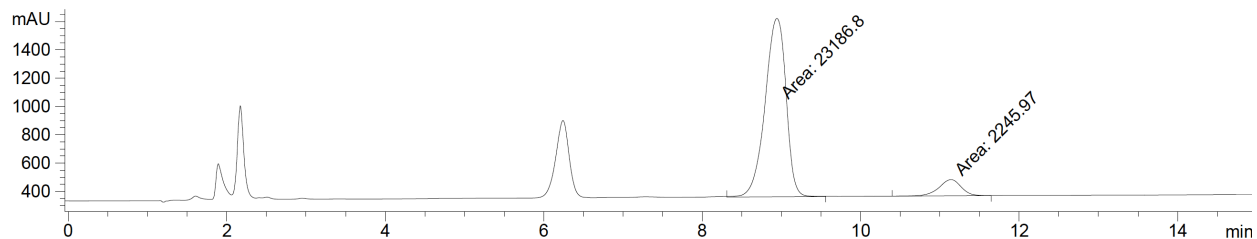

Signal 1: DAD1 A, Sig=210,8 Ref=360,100

| Peak # | RetTime [min] | Type | Width [min] | Area [mAU*s] | Height [mAU] | Area %  |
|--------|---------------|------|-------------|--------------|--------------|---------|
| 1      | 8.943         | FM   | 0.3066      | 2.31868e4    | 1260.37512   | 91.1690 |
| 2      | 11.139        | FM   | 0.3245      | 2245.97192   | 115.36353    | 8.8310  |

With P-I263F V87A A328V A268G (39% ee):

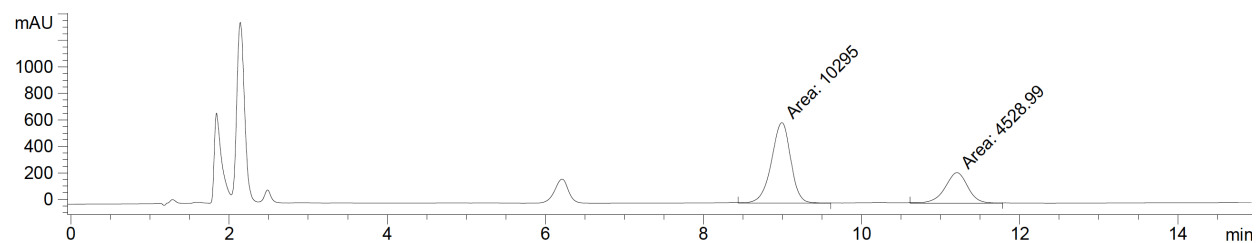

Signal 1: DAD1 A, Sig=210,8 Ref=360,100

| Peak # | RetTime [min] | Type | Width [min] | Area [mAU*s] | Height [mAU] | Area %  |
|--------|---------------|------|-------------|--------------|--------------|---------|
| 1      | 8.991         | MM   | 0.2824      | 1.02950e4    | 607.60736    | 69.4483 |
| 2      | 11.207        | MM   | 0.3293      | 4528.98730   | 229.22603    | 30.5517 |

With P-I263F V87A A328V A268G A82I (88% ee):

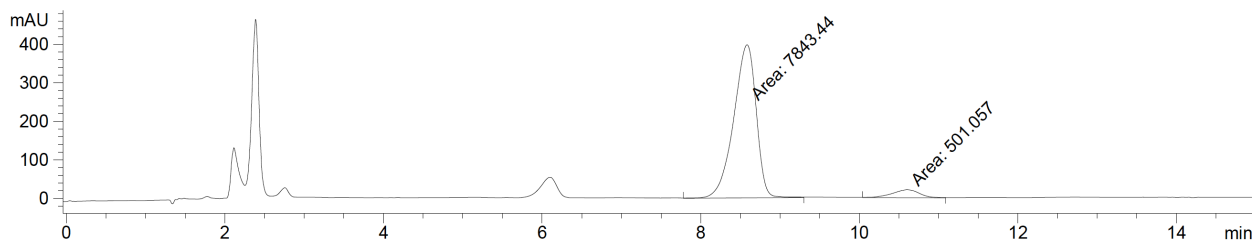

Signal 1: DAD1 A, Sig=210,8 Ref=360,100

| Peak # | RetTime [min] | Type | Width [min] | Area [mAU*s] | Height [mAU] | Area %  |
|--------|---------------|------|-------------|--------------|--------------|---------|
| 1      | 8.584         | MM   | 0.3287      | 7843.44434   | 397.64984    | 93.9954 |
| 2      | 10.605        | MM   | 0.4022      | 501.05716    | 20.76526     | 6.0046  |

**Enantioselectivity for enzyme-catalyzed formation of *S*-(*n*-propyl)-*S*-phenyl-*N*-(4-methylbenzenesulfonyl)sulfimide (18).** Measured by SFC chromatography using Chiralcel OJ-H (10% isopropanol). Racemic standard:

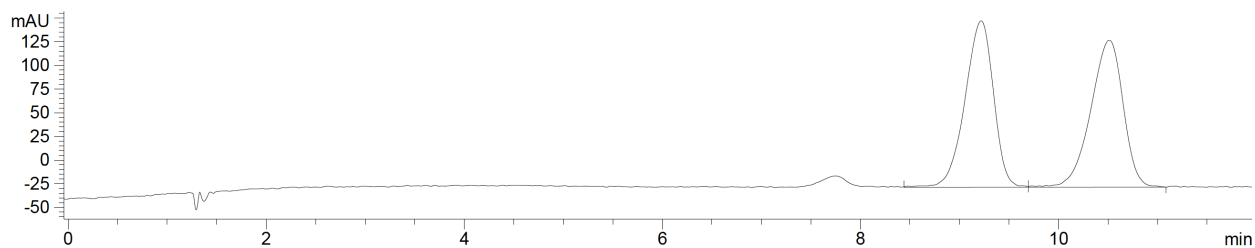

Signal 1: DAD1 A, Sig=210,8 Ref=360,100

| Peak # | RetTime [min] | Type | Width [min] | Area [mAU*s] | Height [mAU] | Area %  |
|--------|---------------|------|-------------|--------------|--------------|---------|
| 1      | 9.217         | BV   | 0.3109      | 3538.38550   | 175.76720    | 49.9964 |
| 2      | 10.513        | VV   | 0.3458      | 3538.90210   | 155.33209    | 50.0036 |

With P-I263F V87A A328V A268G A82I (98% ee):

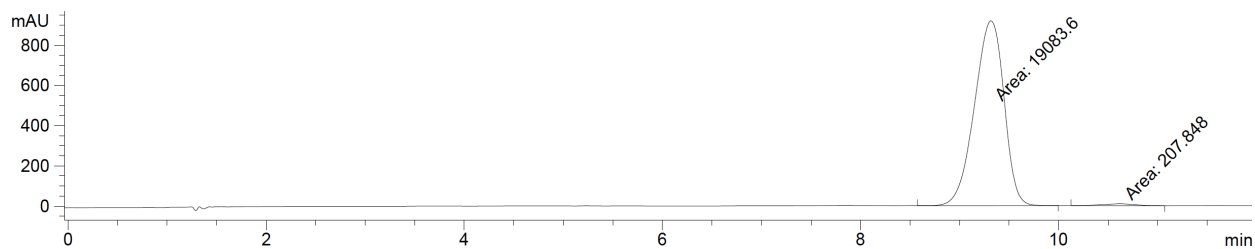

Signal 1: DAD1 A, Sig=210,8 Ref=360,100

| Peak # | RetTime [min] | Type | Width [min] | Area [mAU*s] | Height [mAU] | Area %  |
|--------|---------------|------|-------------|--------------|--------------|---------|
| 1      | 9.317         | MM   | 0.3456      | 1.90836e4    | 920.32013    | 98.9226 |
| 2      | 10.627        | MM   | 0.3657      | 207.84750    | 9.47129      | 1.0774  |

**Enantioselectivity for enzyme-catalyzed formation of *S*-(*n*-butyl)-*S*-phenyl-*N*-(4-methylbenzenesulfonyl)sulfimide (19).** Measured by SFC chromatography using Chiralcel OD-H (15% isopropanol). Racemic standard:

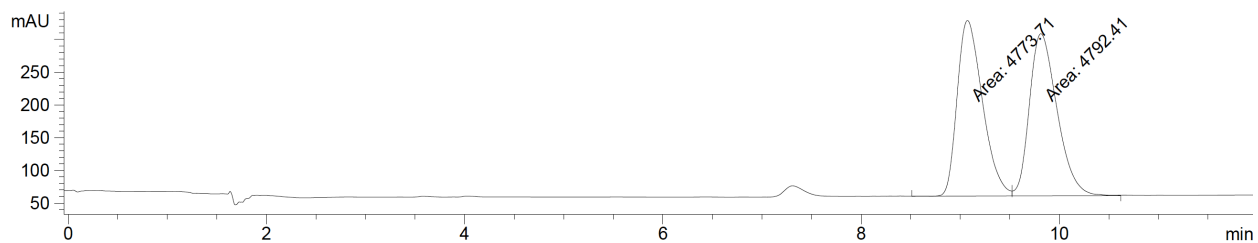

Signal 2: DAD1 B, Sig=235,8 Ref=360,100

| Peak # | RetTime [min] | Type | Width [min] | Area [mAU*s] | Height [mAU] | Area %  |
|--------|---------------|------|-------------|--------------|--------------|---------|
| 1      | 9.073         | FM   | 0.2966      | 4773.71387   | 268.26553    | 49.9023 |
| 2      | 9.814         | MF   | 0.3226      | 4792.41309   | 247.61929    | 50.0977 |

With P-I263F V87A A328V A268G A82I (98% ee):

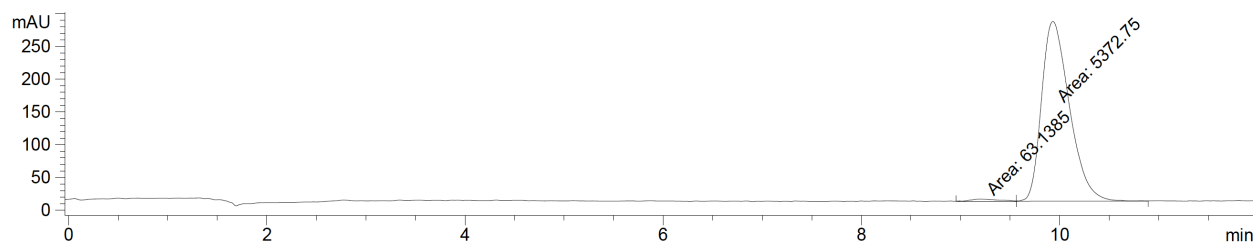

Signal 2: DAD1 B, Sig=235,8 Ref=360,100

| Peak # | RetTime [min] | Type | Width [min] | Area [mAU*s] | Height [mAU] | Area %  |
|--------|---------------|------|-------------|--------------|--------------|---------|
| 1      | 9.222         | MF   | 0.3311      | 63.13852     | 3.17796      | 1.1615  |
| 2      | 9.932         | MF   | 0.3266      | 5372.74609   | 274.14957    | 98.8385 |

## References

- [1] K. P. Vatsis, H.-M. Peng, M. J. Coon, *J. Inorg. Biochem.* **2002**, *91*, 542.
- [2] E. A. Berry, B. L. Trumpower, *Anal. Biochem.* **1987**, *161*, 1.
- [3] S. Kille, C. G. Acevedo-Rocha, L. P. Parra, Z.-G. Zhang, D. J. Opperman, M. T. Reetz, *ACS Synth. Biol.* **2013**, *2*, 83.
- [4] a) M. S. Holzwarth, I. Alt, B. Plietker, *Angew. Chem.* **2012**, *124*, 5447; M. S. Holzwarth, I. Alt, B. Plietker, *Angew. Chem. Int. Ed.* **2012**, *51*, 5351. b) R. Tang, P. Zhong, Q. Lin, *Synthesis* **2007**, *1*, 85.
- [5] F. de Nanteuil, J. Waser, *Angew. Chem.* **2011**, *123*, 12281; F. de Nanteuil, J. Waser, *Angew. Chem. Int. Ed.* **2011**, *50*, 12075.
- [6] S. Balduzzi, M. A. Brook, M. J. McGlinchey, *Organometallics* **2005**, *24*, 2617.
- [7] K. Hiroi, K. Makino, *Chem. Pharm. Bull.* **1988**, *36*, 1727.
- [8] H. Okamura, C. Bolm, *Org. Lett.* **2004**, *6*, 1305.
- [9] a) M. Murakami, T. Katsuki, *Tetrahedron Lett.* **2002**, *43*, 3947. b) M. Murakami, T. Uchida, B. Saito, T. Katsuki, *Chirality* **2003**, *15*, 116.
- [10] a) J. Wang, M. Frings, C. Bolm, *Angew. Chem. Int. Ed.* **2013**, *52*, 8661; J. Wang, M. Frings, C. Bolm, *Angew. Chem.* **2013**, *125*, 8823. b) L. De Luca, G. Giacomelli, *J. Org. Chem.* **2008**, *73*, 3967. c) B. Chao, D. C. Dittmer, *Tetrahedron Lett.* **2001**, *42*, 5789. d) D. Sureshkumar, S. Koutha, S. Chandrasekaran, *Eur. J. Org. Chem.* **2007**, 4543.
- [11] T. K. Hyster, C. C. Farwell, A. R. Buller, J. A. McIntosh, F. H. Arnold, *J. Am. Chem. Soc.* **2014**, *136*, 15505.
- [12] C. C. Farwell, R. K. Zhang, J. A. McIntosh, T. K. Hyster, F. H. Arnold, *ACS Cent. Sci.* **2015**, *1*, 89.

[13] T. Moriwake, S. Hamano, S. Saito, S. Torii, S. Kashino, *J. Org. Chem.* **1989**, *54*, 4114.

[14] G. Velmourougane, M. B. Harbut, S. Dalal, S. McGowan, C. A. Oellig, N. Meinhardt, J. C.

Whisstock, M. Klemba, D. C. Greenbaum, *J. Med. Chem.* **2011**, *54*, 1655.
